1 **Identification of novel basil downy mildew resistance genes using *de novo***  
2 **comparative transcriptomics**

3  
4 Kelly S. Allen<sup>1\*</sup>, Gregory A. Delulio<sup>1\*</sup>, Robert Pyne<sup>2</sup>, Jacob Maman<sup>1</sup>, Li Guo<sup>1</sup>, Robert L.  
5 Wick<sup>3</sup>, James Simon<sup>2</sup>, Anne Gershenson<sup>1</sup>, Li-Jun Ma<sup>1</sup>

6 \*These authors contributed equally to this work.

7 1- University of Massachusetts Amherst Department of Biochemistry and Molecular  
8 Biology, Amherst, MA, USA

9 2- Rutgers University Department of Plant Biology, New Brunswick, NJ, USA

10 3- University of Massachusetts Amherst Stockbridge School of Agriculture, Amherst, MA,  
11 USA

12 Corresponding Author:

13 Li-Jun Ma

14 Telephone: (413) 545-1205

15 E-mail: [lijun@biochem.umass.edu](mailto:lijun@biochem.umass.edu)

|                                                               |      |                                     |                         |
|---------------------------------------------------------------|------|-------------------------------------|-------------------------|
| Total word count (excluding summary, references and legends): | 7610 | No. of figures:                     | 8                       |
| Summary:                                                      | 196  | No. of Tables:                      | 2                       |
| Introduction:                                                 | 950  | No of Supporting Information files: | 5 (2 figures, 3 tables) |
| Materials and Methods:                                        | 1674 |                                     |                         |
| Results:                                                      | 3588 |                                     |                         |
| Discussion:                                                   | 1145 |                                     |                         |
| Acknowledgements:                                             | 124  |                                     |                         |

16

17

## 18      **Summary**

- 19            ● Sweet basil (*Ocimum basilicum* L.) production is threatened by the oomycete  
20            pathogen *Peronospora belbahrii* causing basil downy mildew (BDM); BDM  
21            resistant cultivar ‘Mrihani’ (MRI) was identified in a germplasm screen, and  
22            fertile progeny were produced through a breeding program with BDM-  
23            susceptible ‘Newton’ (SB22), but the molecular mechanisms conferring  
24            resistance in MRI and progeny remained unknown
- 25            ● Comparative transcriptomics was performed to identify candidate resistance  
26            genes and potential mechanisms for BDM resistance; RNA samples from BDM-  
27            infected MRI and SB22 plants were harvested at 4 time points during the first  
28            3 days of infection to differentiate interactions in resistant and susceptible  
29            plants.
- 30            ● Three categories of genes uniquely induced in resistant MRI upon pathogen  
31            challenge were identified: nucleotide-binding leucine rich repeat proteins  
32            (NLRs), multi-functional receptor-like kinases (RLKs), and secondary metabolic  
33            enzymes; validation of the top resistance candidate NLR gene confirmed its  
34            unique presence in MRI as well as in two of four resistant MRIxSB22 F<sub>2</sub>  
35            progeny.
- 36            ● In MRI, pathogen challenge also upregulated transcripts in the salicylic acid  
37            synthesis pathway, suggesting its role in BDM resistance, and demonstrating  
38            the application of using comparative transcriptomics to identify resistance  
39            genes and mechanisms in non-model crops for marker-assisted breeding  
40            approaches.

41 **Keywords:** *Ocimum basilicum* (sweet basil), *Peronospora belbahrii*, resistance,  
42 downy mildew, salicylic acid, transcriptomics

43

## 44 **INTRODUCTION**

45 Basil (genus *Ocimum*) is a major herb crop with diverse species and cultivars possessing  
46 distinct phenotypes in plant size, leaf shape, aroma, and flavor (Vieira & Simon, 2006).

47 Sweet basil (*Ocimum basilicum* L.) is the most popular basil and is cultivated for culinary  
48 use and essential oil production for applications including medicine, health care products,  
49 and food additives. In 2019, revenue generated in the US from sweet basil and other  
50 culinary herbs grown for dry processing and fresh market sales was estimated to be \$165  
51 million dollars, and other estimates have even valued the retail market above \$300 million  
52 dollars (Wyenandt *et al.*, 2015; (dataset) *USDA National Agricultural Statistics Service*  
53 (2017).)

54

55 Basil Downy Mildew (BDM), caused by the biotrophic oomycete *Peronospora belbahrii*,  
56 has become the most important disease posing a serious threat to global basil production  
57 since its introduction and movement in Europe in 2001 and the US in 2007 (Belbahri *et*  
58 *al.*, 2005; Wyenandt *et al.*, 2015). The pathogen enters plant tissue through open stomata  
59 or direct penetration of the upper cuticle, and colonizes leaf tissue intercellularly, causing  
60 characteristic symptoms of interveinal chlorosis several days after infection (Wyenandt *et*  
61 *al.*, 2015; Cohen *et al.*, 2017). Following sustained periods of high relative humidity  
62 (>85%), the pathogen produces sporangiophores bearing infective sporangia, which  
63 emerge through stomata and create a gray to dark-gray discoloration corresponding to

64 interveinal chlorosis (Wyenandt *et al.*, 2015; Cohen *et al.*, 2017). The sporangia are  
65 aerially dispersed and cause polycyclic infections throughout large areas of production  
66 (Wyenandt *et al.*, 2015; Cohen *et al.*, 2017). After prolonged infection, the leaves  
67 desiccate and are abscised from the plant (Wyenandt *et al.*, 2015; Cohen *et al.*, 2017).  
68 Symptoms and signs of BDM disease render plants unfit for commercial sale (Wyenandt  
69 *et al.*, 2015).

70  
71 First reported in Uganda in 1930, BDM began to attract attention in 2001 when disease  
72 instances were increasingly reported across the world with reports from the Americas,  
73 Asia, and Europe (Garibaldi *et al.*, 2004, 2005; McLeod *et al.*, 2006; Khateri *et al.*, 2007;  
74 Roberts *et al.*, 2009; Ronco *et al.*, 2009; Martínez de la Parte *et al.*, 2010; Nagy & Horváth,  
75 2011; Kanetis *et al.*, 2014; Šafránková & Holková, 2014; Choi *et al.*, 2016). BDM was first  
76 reported in the US in 2007 in Florida, and then in the Northeast the following year (Roberts  
77 *et al.*, 2009; Wyenandt *et al.*, 2015). As of 2021, BDM has been reported in 44 US states,  
78 including Hawaii and the District of Columbia (Wyenandt *et al.*, 2015; McGrath, 2021,  
79 2022a), threatening productivity in every growing region.

80  
81 Chemical and cultural control methods to prevent infection and reduce disease spread  
82 include conventional fungicides (Homa *et al.*, 2014; McGrath, 2020b), nocturnal fanning  
83 (Cohen & Ben-Naim, 2016), nocturnal illumination (Cohen *et al.*, 2013), and daytime solar  
84 heating (Cohen & Rubin, 2015). However, these measures can be prohibitively time  
85 consuming and costly, necessitating the development of improved basil cultivars with  
86 BDM resistance. Initial screening of basil germplasm identified the *O. basilicum* 'Mrihani'

87 (MRI) (Horizon Seed Co., Williams, OR) with significant resistance to BDM (Pyne *et al.*,  
88 2015). This cultivar has a unique anise/fennel aroma and flavor profile, and a distinctive  
89 phenotype as compared to other *O. basilicum* cultivars selected for culinary use. For  
90 example, the MRI leaves are smaller than other basil cultivars and have serrated leaves  
91 compared to the large downward cupped smooth leaves of commercial sweet basil  
92 (Figure 1A). Most importantly, the taste and smell of MRI due to its unique methyl chavicol  
93 chemotype differs considerably from eugenol-enriched sweet basil (Pyne *et al.*, 2015).  
94 This cultivar was used in a parental cross with BDM-susceptible and the Fusarium-  
95 resistant 'Newton' (also referred to as Rutgers breeding line SB22), and successfully  
96 produced fertile offspring. From the six-generation breeding design, four BDM resistant  
97 cultivars ('Devotion', 'Obsession', 'Passion', and 'Thunderstruck') were selected from the  
98 backcrossed population progeny with improved downy mildew resistance and desirable  
99 phenotypes and chemotypes (Simon *et al.*, 2018).

100

101 Screening of the full-sibling family offspring of the MRI x SB22 cross revealed additive  
102 and dominant gene effects of the MRI-conferred resistance, leading to the hypothesis that  
103 dominant alleles are involved in resistance (Pyne *et al.*, 2015). A quantitative trait locus  
104 (QTL) analysis of the F<sub>2</sub> mapping population from the cross between MRI and SB22  
105 identified a single locus (*dm11.1*) that accounts for 20%-28% of the variance observed  
106 among the F<sub>2</sub> population (Pyne *et al.*, 2017). In addition, this study also identified two  
107 minor loci (*dm9.1* and *dm14.1*) that respectively contributed 5-16% and 4-18% of the F<sub>2</sub>  
108 population's phenotypic variation. Resistance (R) genes involved in quantitative disease  
109 resistance map to QTLs (Nelson *et al.*, 2018), and the results of the linkage mapping

110 performed in the 'MRI' X SB22 F2 mapping population suggest that these loci may contain  
111 genes conferring quantitative disease resistance in 'MRI'. Without genome assemblies of  
112 the basil cultivars, the underlying causative genes remained unknown.

113  
114 A comparative transcriptomic analysis was designed to identify unique genes involved in  
115 the interactions of the resistant cultivar MRI and the susceptible commercial cultivar SB22  
116 with the pathogen *P. belbahrii*. RNA was extracted at 12, 24, 48, and 72 hours post  
117 inoculation (hpi) representing roughly germination, penetration, and intercellular growth  
118 stages. Global transcription expression profiles identified three categories of genes  
119 uniquely induced in the MRI cultivar upon pathogen challenge, including R genes  
120 encoding nucleotide-binding leucine rich repeat proteins (NLRs), receptor-like kinases  
121 (RLKs) that sense conserved microbe-associated molecular patterns, and secondary  
122 metabolic enzymes. Validation of the top candidate resistance NLR protein-encoding  
123 gene confirmed its unique presence in the MRI cultivar as well as two out of the four  
124 resistance hybrids. Unique upregulation of the salicylic acid synthesis pathway in MRI  
125 suggests the perturbation of this important hormone signaling pathway in conferring BDM  
126 resistance.

127

## 128 **MATERIALS AND METHODS**

### 129 **Sample preparation**

130 Inbred *O. basilicum* genotypes SB22 (*P. belbahrii* susceptible) and MRI (*P. belbahrii*  
131 resistant) plants were grown from seed. Previously infected sweet basil leaves with fresh  
132 *P. belbahrii* sporulation were harvested and agitated for 5 minutes in sterile distilled water

133 (diH<sub>2</sub>O). The inoculum mixture was filtered with 40 µm nylon mesh. A 1 mL subsample  
134 from the filtered inoculum was pipetted into an Eppendorf tube and frozen at -80°C to  
135 serve as a pathogen control. The remaining inoculum was centrifuged at 1,000g for 1 min  
136 and diH<sub>2</sub>O decanted. The resulting sporangia pellet was resuspended in diH<sub>2</sub>O, and the  
137 inoculum concentration was adjusted to 1 x 10<sup>5</sup> sporangia/mL. Four-to-six-week-old MRI  
138 and SB22 plants were spray-inoculated at the 6-leaf (3 true leaf set) growth stage with  
139 approximately 1 mL/leaf and plants were incubated at 100% relative humidity for 24  
140 hours. A set of MRI and SB22 plants were sprayed with diH<sub>2</sub>O in triplicate to serve as the  
141 mock inoculated control.

142  
143 Four disks per true leaf were sampled from both genotypes at 12, 24, 48 and 72 hpi and  
144 immediately flash frozen in liquid nitrogen. The water control leaves were harvested at 12  
145 hpi only. Total RNA was extracted from freshly ground tissue using the Spectrum™ Plant  
146 Total RNA Kit (Sigma Aldrich). RNA samples were used to generate sequence libraries  
147 using a library prep kit from New England Biolabs (NEB #E7530). Paired-end sequence  
148 reads of 75 bp were generated at the TUFs genomic center at the Tufts University  
149 School of Medicine using the Hi-Seq Illumina platform. Higher coverage analyses were  
150 specifically designed for inoculated samples that contain both the pathogen and the host  
151 due to the increased complexity of these samples, allowing for further study of pathogen  
152 expression.

153

154

155

## 156 **Generating transcript assemblies and FPKM expression**

157 FASTQC version 0.11.5 (Andrews, 2010) was used to assess average read quality.  
158 Paired-end reads (fastq files) were provided to Trinity version 2.4.0 and assembled using  
159 default parameters (Grabherr *et al.*, 2011). Datasets were assembled including single  
160 sets using either all MRI datasets and the sporangia control (MRI Combined Assembly)  
161 or all SB22 datasets including the sporangia control (SB22 Combined Assembly).  
162 Separately assembled control data provided organism specific databases of genes and  
163 transcripts.

164  
165 The resulting output files served as the references for expression quantification. RSEM  
166 version 1.2.29 (Li & Dewey, 2011) and bowtie version 1.0.0 (Langmead *et al.*, 2009) were  
167 used to calculate FPKM (Fragments per Kilobase exon per Million mapped reads) values  
168 for assembled contigs while tracking replicate information. RNAseq datasets from both  
169 MRI and SB22 were mapped to the infected MRI Combined Assembly to standardize the  
170 reference which allowed us to use previously generated gene annotations and to cluster  
171 genes from both cultivars together. In all cases the standard settings were used for  
172 assembly and transcript quantification. Additionally, edgeR (Robinson *et al.*, 2010) was  
173 used to calculate differential gene expression. Expression data from both MRI and SB22  
174 data mapped to the MRI Combined Assembly using Trinity and edgeR was used to  
175 assess differential expression between all timepoints within a single cultivar. Trinity DEG  
176 output data was filtered for genes with a p-value less than 0.05 and FDR less than 0.01.

177

178



## 179 **Reciprocal BLAST hits and reference gene phylogeny**

180 To explore the overall sequence conservation between MRI and SB22, we performed a  
181 reciprocal BLAST using all sequences within the MRI and SB22 water control assemblies.  
182 Briefly, all MRI sequences were compared to the SB22 transcriptome, and all SB22  
183 sequences were compared to the MRI transcriptome. The hit with the highest BLAST  
184 score for each gene was chosen. Results were compared and pairs of top scoring genes  
185 were considered reciprocal best BLAST hits (i.e., MRI gene X BLASTs to SB22 gene Z,  
186 and SB22 gene Z BLASTs to MRI gene X).

187  
188 Sequence conservation between MRI and SB22 was further assessed by performing a  
189 phylogenetic analysis using 9 protein-coding chloroplast genome genes based on a  
190 prior analysis (Rastogi *et al.*, 2015). The MRI and SB22 chloroplast genes were  
191 identified using BLAST against the MRI and SB22 water control assemblies, and the top  
192 hits with the highest bit scores were chosen and translated into coding sequences.

193 Sequence alignment of the MRI and SB22 coding sequences was performed against  
194 sequences from 14 asterid lineage plants downloaded from NCBI Organelle Genome  
195 Resources database, with *Spinacia oleracea* L. and *Arabidopsis thaliana* L. set as  
196 outgroups (Rastogi *et al.*, 2015). The gene sequences were aligned using MAFFT  
197 (Madeira *et al.*, 2019), and the tree was generated using IQ-TREE (Minh *et al.*, 2020).

198

## 199 **Sequence Translation and Annotation**

200 We generated a database of sequence annotations for MRI genes. All MRI genes with an  
201 expression of FPKM >1 in at least one time point were chosen and the longest transcript

202 associated with that gene was compared to the NCBI non-redundant database using  
203 cloud BLAST through Blast2GO. Annotations were saved as a searchable database in  
204 text format. Genes were filtered by taxonomic hit to verify their species of origin as  
205 needed.

206  
207 To facilitate easier searches for gene families of interest, we translated the longest  
208 nucleotide sequence associated with each gene into six-frame translated protein  
209 sequences using EMBOSS, searching for only those translated sequences between  
210 START and STOP codons longer than 30 amino acids. In many cases to verify protein  
211 domain structure, the nucleotide or protein sequence was analyzed using either the NCBI  
212 conserved domain finder (Marchler-Bauer *et al.*, 2015), PFAM (Finn *et al.*, 2016), or  
213 InterProScan (Jones *et al.*, 2014). Sequences were aligned using MEGA 6 for visual  
214 inspection (Tamura *et al.*, 2013).

215

### 216 **Expression clustering toward candidate resistance gene identification**

217 Genes were clustered using Trinity version 2.2.0 based on read counts following the steps  
218 outlined in the Trinity manual (Robinson *et al.*, 2010). Expression data generated by  
219 mapping all datasets to the MRI Combined Assembly were used for clustering. A matrix  
220 of gene expression at all timepoints and replicates was used to define clusters with the  
221 edgeR function associated with Trinity, using  $p=50$  and  $p=20$  (a grouping parameter for  
222 cluster creation, with higher numbers forming larger and broader clusters). The resulting  
223 clusters, available in pdf format, were visually examined for clusters which displayed the  
224 target expression profile.

## 225 **BLAST search for secondary metabolite enzyme and resistance genes**

226 To analyze MRI unique gene families and defense hormone signaling genes, we  
227 performed BLASTp search against MRI and SB22 translated nucleotide sequences using  
228 *A. thaliana*, or in some cases sweet basil, protein sequences retrieved from NCBI.  
229 Generally, the hit with the highest bit score was chosen as the top hit for each sequence.  
230 In cases of short alignment length or low sequence identity, the recovered MRI or SB22  
231 hit was compared to the green plant database on NCBI. BLAST version 2.2.22 was used  
232 in all cases to compare protein sequences (Altschul *et al.*, 1990) at the Massachusetts  
233 green-energy high performance computing center (MGHPCC).

234

## 235 **PCR screen of parent and cultivar genomic DNA for unique genes**

236 Genomic DNA was prepared from approximately 80mg of newly emerging leaf tissue of  
237 MRI, SB22, 'Devotion', 'Obsession', 'Passion' and 'Thunderstruck' cultivars using the  
238 E.Z.N.A. SP Plant DNA Kit (Omega BioTek, Norcross, GA) (Pyne *et al.*, 2017). Primers  
239 amplifying transcript sequences were designed for MRI and SB22 shared genes as well  
240 as MRI unique genes including the comp160460c0 transcript, and were ordered from IDT  
241 (Coralville, IA). The primers were either external primers designed to amplify the whole  
242 gene (MRI\_134-F 5'-CCGAGAAAATCGATCTAGAGAG-3', MRI\_2869-R 5'-  
243 CTAGCTTGATCTTTTAATTGGTGGAAAAAT-3') or internal primers for specific regions  
244 of interest (Supporting Information Table S1). Primers amplifying a 198bp fragment of the  
245 *O. basilicum* Actin gene (ObActin\_2-F 5'-GTTATGCACTTCCCCATGCT-3', ObActin\_2-R  
246 5'-GAGCTGTTCTTTGCGGTCTC-3') were used in positive control reactions for all  
247 cultivars. PCR was performed with Q5 High-Fidelity DNA Polymerase (New England

248 Biolabs, Ipswich, MA) using manufacturer-recommended cycling conditions with a 30  
249 second denaturation cycle to ensure full denaturation of genomic DNA, a 30 second  
250 extension time to amplify the 198bp ObActin region and a 120 second extension time to  
251 amplify the ~3.5kb comp160460-encoded gene on a Mastercycler proS (Eppendorf,  
252 Hamburg, Germany). Water was used as a negative control template in all reaction sets.  
253 Amplicons were visualized on 1.5% agarose gels stained with SYBR Safe DNA Gel Stain  
254 (Invitrogen, Waltham, MA), and imaged under UV light.

255

### 256 **NLR allele analysis**

257 Successfully amplified comp160460c0 products from MRI, 'Devotion' and 'Obsession'  
258 were purified using a QIAquick PCR purification kit (QIAGEN, Hilden, Germany) and  
259 single amplicon copies were ligated into the pMiniT 2.0 vector using the NEB PCR Cloning  
260 Kit (New England Biolabs, Ipswich, MA). Individual clones were selected and confirmed  
261 via colony PCR using Q5 High-Fidelity DNA Polymerase (New England Biolabs, Ipswich,  
262 MA) with primers 1BF and 8R which were designed to amplify the coiled coil and NB-ARC  
263 domain coding sequences of MRI-R1. Plasmid DNA was prepared from confirmed clones  
264 using the Zyppy Plasmid Miniprep Kit (Zymo Research, Irvine, CA).

265

266 Individual comp160460c0 clones from MRI, 'Devotion' and 'Obsession' were sequenced  
267 using NEB PCR Cloning Kit Cloning Analysis Forward and Reverse primers to flank the  
268 insert, as well as internal primers (Supporting Information Table S1). Twelve clones were  
269 sequenced from MRI, and six clones were sequenced from both 'Devotion' and  
270 'Obsession'. Consensus sequences for each clone were assembled and annotated to

271 identify intron regions by alignment to transcript sequences; coding regions were  
272 confirmed and annotated using InterProScan (Jones *et al.*, 2014). Assembled sequences  
273 were identified as individual alleles, nucleotide and predicted protein sequences were  
274 aligned using the EMBL-EBI Clustal Omega multiple sequence alignment tool (Madeira  
275 *et al.*, 2019), and alignments were visualized using Jalview 2.11.1.4 (Waterhouse *et al.*,  
276 2009).

277  
278 Protein structures were predicted using RoseTTAFold (Baek *et al.*, 2021), and the  
279 predicted secondary structure was added to the Clustal Omega allele sequence  
280 alignment using ESPript 3.0 (Robert & Gouet, 2014). Allele structures were used as a  
281 query search against the Protein Data Bank in DALI, and structure pairwise comparison  
282 was performed (Holm, 2020). Allele structures were further analyzed and aligned using  
283 UCSF Chimera (Pettersen *et al.*, 2004). Allele expression was analyzed by mapping the  
284 variable coding regions to the RNA-seq data using Burrows-Wheeler Aligner software  
285 package (BWA-MEM) (Li & Durbin, 2009), and results were visually examined using the  
286 Integrated Genomics Viewer (Robinson *et al.*, 2011).

287

## 288 **RESULTS**

### 289 **Sequencing data reflect phylogenetic relatedness of MRI and SB22**

290 We generated 12.8 million (MRI), 14.3 million (SB22), and 9.9 million (Sporangia) high  
291 quality paired-end reads per replicate for three controls (Table 1, Supporting Information  
292 Figure S1). Considering the increased complexity of infected samples, we doubled the  
293 sequence coverage and generated an average 24.8 million and 27.6 million high quality

294 Illumina paired-end reads per replicate per infection sample for MRI and SB22,  
295 respectively (Table 1, Supporting Information Figure S1). All sequence data were  
296 deposited at NCBI under GEO NUMBER: GSE111387.

| Dataset (organism)                                            | Read pairs (millions) | Mapping Percentage | Average base quality | Number of Genes | Average gene length | Average coverage |
|---------------------------------------------------------------|-----------------------|--------------------|----------------------|-----------------|---------------------|------------------|
| Sporangia ( <i>P. belbahrii</i> )                             | 29.7                  | 84.1               | 37.28                | 10144           | 1603                | 230.4            |
| MRI Water ( <i>O. basilicum</i> MRI)                          | 42.7                  | 62.0               | 37.20                | 66930           | 893                 | 66.4             |
| MRI 12 hpi ( <i>O. basilicum</i> MRI, <i>P. belbahrii</i> )   | 75.9                  | 63.3               | 37.21                | 81873           | 897                 | 98.1             |
| MRI 24 hpi ( <i>O. basilicum</i> MRI, <i>P. belbahrii</i> )   | 75.3                  | 63.3               | 37.22                | 89302           | 864                 | 92.6             |
| MRI 48 hpi ( <i>O. basilicum</i> MRI, <i>P. belbahrii</i> )   | 77.0                  | 63.1               | 37.23                | 85832           | 860                 | 98.7             |
| MRI 72 hpi ( <i>O. basilicum</i> MRI, <i>P. belbahrii</i> )   | 69.8                  | 63.4               | 37.22                | 78061           | 909                 | 93.5             |
| SB22 Water ( <i>O. basilicum</i> SB22)                        | 38.3                  | 62.9               | 37.18                | 52844           | 977                 | 69.9             |
| SB22 12 hpi ( <i>O. basilicum</i> SB22, <i>P. belbahrii</i> ) | 85.9                  | 63.9               | 37.18                | 74918           | 934                 | 117.6            |
| SB22 24 hpi ( <i>O. basilicum</i> SB22, <i>P. belbahrii</i> ) | 83.2                  | 63.3               | 37.19                | 72699           | 949                 | 114.5            |
| SB22 48 hpi ( <i>O. basilicum</i> SB22, <i>P. belbahrii</i> ) | 75.9                  | 65.2               | 37.15                | 84478           | 870                 | 100.9            |
| SB22 72 hpi ( <i>O. basilicum</i> SB22, <i>P. belbahrii</i> ) | 86.6                  | 66.6               | 37.20                | 80675           | 903                 | 117.7            |
| MRI Combined Assembly                                         | 370.4                 | 64.8               | 37.22                | 133,441         | 765                 | 352.6            |
| SB22 Combined Assembly                                        | 399.6                 | 66.0               | 37.19                | 118,296         | 692                 | 477.7            |

297

298 **Table 1. Summary of assembled transcripts by timepoint.**

299 In total, 240.2 million paired-end reads were used to generate the MRI Combined  
300 Assembly, containing 341,633 unique transcripts corresponding to 133,441 genes called  
301 by Trinity. The SB22 Combined Assembly was generated using 263.9 million paired-end  
302 reads and contained 118,296 genes and a total of 322,696 unique transcripts. The MRI  
303 and SB22 plant-only control assemblies contained 66,930 and 52,844 genes respectively,  
304 and the sporangia control contained 10,144 assembled genes. As expected, more genes  
305 were assembled in infected samples, representing both host and pathogen transcripts,  
306 genes expressed only during infection, and assembly errors (fragmented sequences)  
307 introduced as transcriptome complexity increased.

308

309 Though fewer reads were sequenced for both water and sporangia control samples, the  
310 sporangia control produced the highest sequence coverage (>90x) and longest average

311 gene length (1,603 bp) for assembled genes, likely due to the smaller  
312 genome/transcriptome size of the (inactive) pathogen. The average assembled gene  
313 length of *O. basilicum* transcripts from a previously published transcriptome was 1,363  
314 bp (Rastogi *et al.*, 2014), larger than our average assembly size. The average gene size  
315 of the oomycete *Phytophthora infestans* was 1,523 bp (Haas *et al.*, 2009), roughly  
316 equivalent to the sporangia control assembly.

317

318 To assess the genetic diversity between MRI and SB22, we performed a BLAST search  
319 between MRI and SB22 water control assemblies and identified 20,943 reciprocal hits,  
320 likely representing orthologs between these two plants. These orthologs are highly similar  
321 with an average pairwise sequence identity of 98.66% (Figure 1B). We further assessed  
322 the genetic similarity between the cultivars by conducting a phylogenetic analysis of nine  
323 protein-coding chloroplast genome orthologs across members of the asterid clade, to  
324 which *O. basilicum* belongs, and with *A. thaliana* and *S. oleracea* set as outgroups  
325 (Rastogi *et al.*, 2015). The analysis showed high sequence conservation among the  
326 *Ocimum* spp. with MRI and SB22 grouped together (Figure 1C). We anticipate that unique  
327 genes or differentially regulated genes are likely to contribute to the MRI and SB22  
328 phenotypic variations.

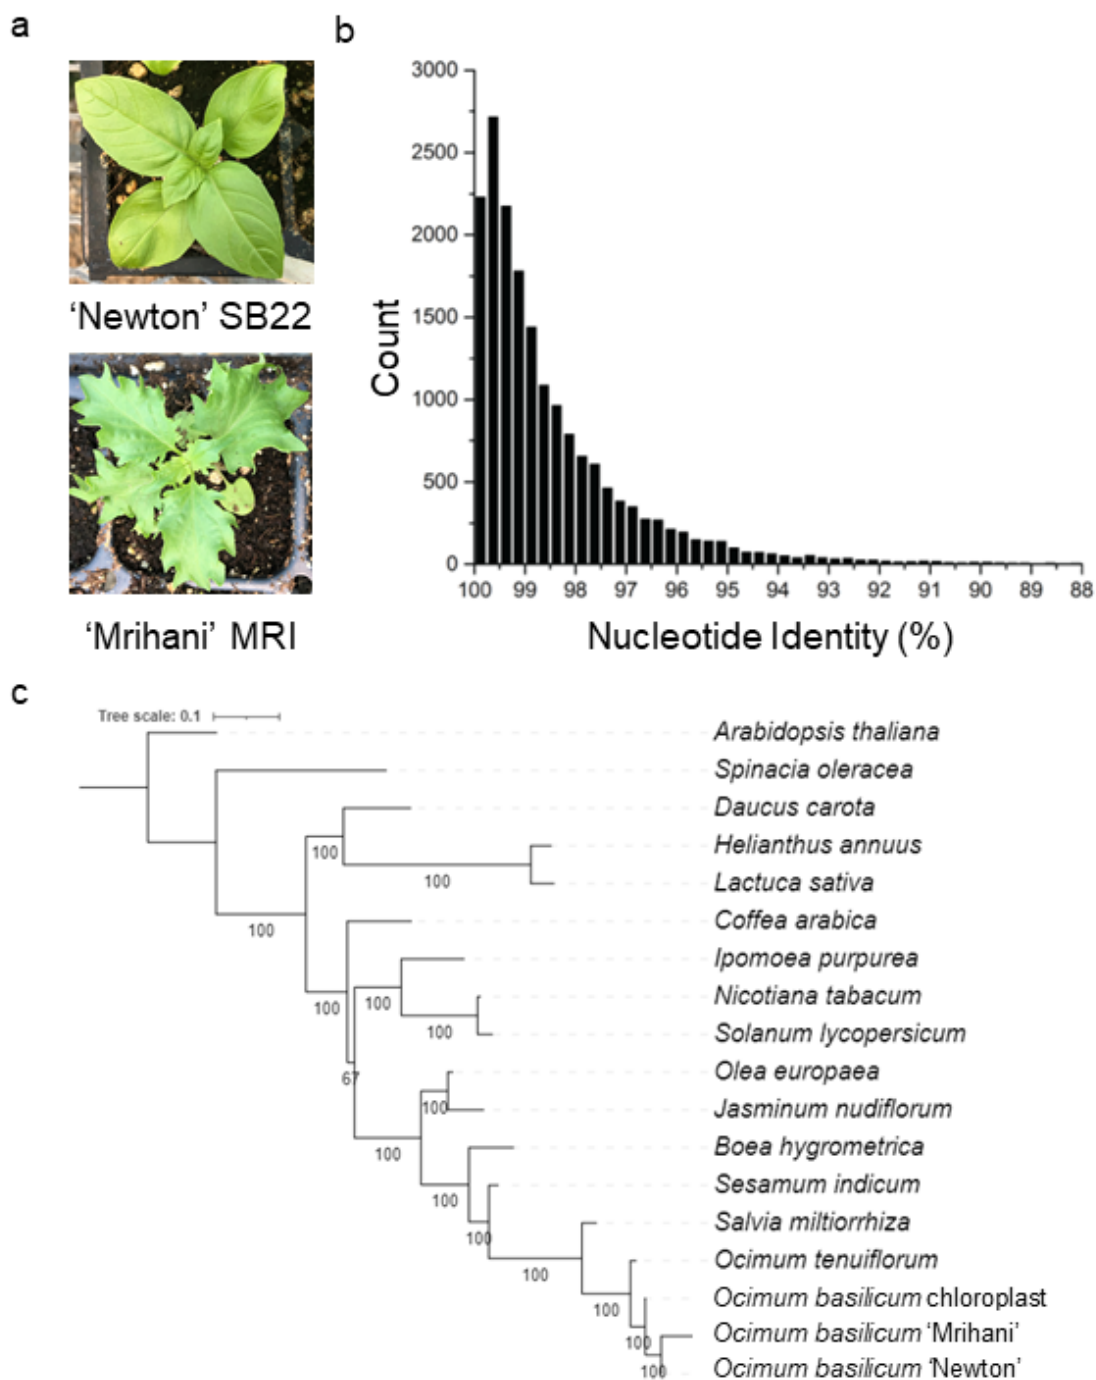

329

330 **Figure 1: Basil cultivar phenotypic and genetic diversity.** (a) BDM susceptible  
331 'Newton' (SB22) and resistant 'Mrihani' (MRI) cultivars. (b) Bi-directional blast hit among  
332 20,943 genes shared between the SB22 and MRI water references. The nucleotide  
333 identity for each top BLAST hit is graphed here with a bin size of 0.25%. (c) Multigene  
334 phylogeny of chloroplast genome orthologs across members of the asterid clade.  
335



336 Using expression profiles in the individual assemblies, MRI transcripts can be divided into  
337 36,414 predicted plant transcripts (present in the MRI water control), 9,988 predicted  
338 pathogen transcripts (present in the sporangia control), and 29,502 infection unique  
339 transcripts (absent in both plant and pathogen controls) (Table 2). Similarly, the SB22  
340 transcripts include 31,702 transcripts with a plant origin, 9,426 transcripts of pathogen  
341 origin, and 26,486 transcripts uniquely present in the infection samples. Consistent with  
342 SB22 susceptibility, we saw a significant increase in the number of expressed pathogen  
343 genes in the susceptible host, observing an almost 20-fold increase from 12 to 72 hpi  
344 compared to only a two-fold increase for MRI (Figure 2). Measuring total pathogen mRNA  
345 abundance (the number of reads mapping to roughly 4,553 pathogen genes), we detected  
346 a 43-fold increase in mapped pathogen reads from the SB22 72 hpi samples relative to  
347 the MRI 72 hpi samples (Figure S2).

348

349

350

351

352

353

354

355

356

357

358

359 **Table 2: Expressed genes across timepoints**

| Dataset             | Number of Genes FPKM > 1 |               |                          |                  |
|---------------------|--------------------------|---------------|--------------------------|------------------|
|                     | Total Genes              | Plant Control | Sporangia Control        | Infection Unique |
| MRI Water           | 36,528                   | 36,414*       | 0                        | 0                |
| MRI 12 hours        | 39,349                   | 29,247        | 472                      | 9,534            |
| MRI 24 hours        | 40,171                   | 29,074        | 389                      | 10,606           |
| MRI 48 hours        | 40,973                   | 28,852        | 179                      | 11,840           |
| MRI 72 hours        | 39,279                   | 28,365        | 825                      | 9,987            |
| Sporangia           | 10,102                   | 0             | 9,988*                   | 0                |
| <b>Total unique</b> | <b>76,018</b>            | <b>36,414</b> | <b>9,988<sup>+</sup></b> | <b>29,502</b>    |
| SB22 Water          | 31,794                   | 31,702*       | 0                        | 0                |
| SB22 12 hours       | 35,561                   | 25,770        | 274                      | 9,431            |
| SB22 24 hours       | 36,732                   | 25,584        | 699                      | 10,364           |
| SB22 48 hours       | 40,216                   | 25,746        | 1,788                    | 12,598           |
| SB22 72 hours       | 40,838                   | 25,414        | 5,375                    | 9,962            |
| Sporangia           | 9,518                    | 0             | 9,426*                   | 0                |
| <b>Total unique</b> | <b>67,706</b>            | <b>31,702</b> | <b>9,426<sup>+</sup></b> | <b>26,486</b>    |

\*- When the data was split into 3 sets 114 MRI points and 92 SB22 points were removed due to ambiguity

+ - The numbers displayed in in the chart above are total genes in each category as split by FPKM based separation after mapping to each master assembly. If the gene had a non-zero FPKM in the sporangia samples it was included in the "sporangia" sample. The difference in gene count is a reflection of mapping to two seperate assemblies.

360

361

362

363

364

365

366

367

368

369

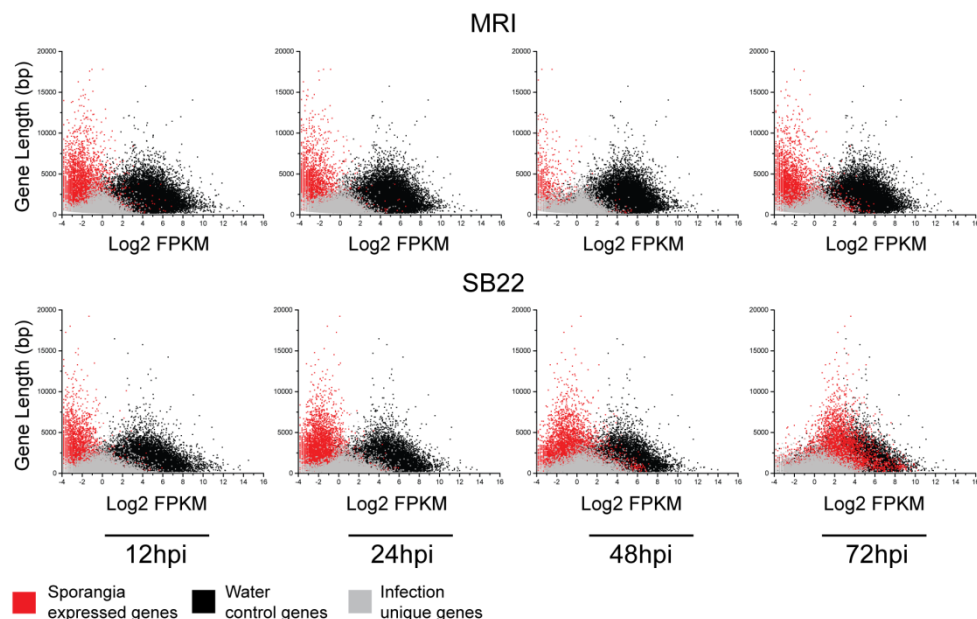

370 **Figure 2. Plant and pathogen gene expression profiles from clustering of the MRI**  
371 **Combined Assembly.** Clustering was done using all datasets mapped to the MRI  
372 combined assembly. Cluster numbers are displayed above each cluster image. Dataset  
373 and replicate are listed on the bottom x-axis. Sporangia expressed gene expression is  
374 in red, infection unique gene expression is in gray and gene expression in the mock  
375 infected water controls are in black for both MRI and SB22.

376  
377 **Clustering analysis highlights transcripts with potential functions involved in**  
378 **host - pathogen interactions**

379 Based on overall ortholog identity, we were confident that SB22 reads from orthologous  
380 genes would align to the MRI assembly. Using the MRI Combined Assembly as a  
381 reference, we mapped all the SB22 and MRI reads using RSEM with default parameters.  
382 Initial coarse clustering using all genes from MRI and SB22 mapped data resulted in 12  
383 clusters with on average 2,810 genes per cluster (Supporting Information Table S2).  
384 Three clusters that lacked consistency among biological replicates were not included in  
385 further analyses. Three clusters (A1, A2 and A3) characterized transcripts primarily  
386 belonging to the pathogen (Figure 3 panel A), as all transcripts showed significant  
387 expression in sporangia pathogen control samples (Figure 3 grey bar in the middle), but

388 no expression in both water-inoculated plant control samples (Figure 3 two blue bars  
389 representing MRI-water only and SB22-water only).

390

391 Six clusters containing primarily plant transcripts were identified. All transcripts showing  
392 significant expression in plant and infected plant samples that were absent from  
393 sporangia pathogen control samples were filtered (Panels B and C). The remaining genes  
394 from the six plant gene clusters represent plant transcripts during pathogen challenge.  
395 Transcripts within three clusters, B-1, B-2 and B-3, had comparable expression profiles  
396 between MRI and SB22, indicating conserved functions between the two different plant  
397 hosts. Both B-1 and B-2 clusters show a pattern consistent with a 12-hour shift in  
398 photoperiod, but these clusters respond in opposite directions. Cluster B-1 was  
399 upregulated at 24, 48, and 72 hpi and was enriched for metabolism, oxidation-reduction,  
400 and photosynthesis functions. No GO terms were significantly enriched in cluster B-2  
401 which showed downregulation at 24, 48, and 72 hpi; however, of those GO terms  
402 annotated by Blast2Go metal ion functions were predominant. The largest cluster, B-3,  
403 roughly represents stably expressed plant genes. Cluster B-3 is enriched for many  
404 categories including various metabolic processes, protein modification, and protein  
405 localization, among others.

406

407 Transcripts in three clusters, C-1, C-2, and C-3 displayed differential regulation responses  
408 between MRI and SB22 during pathogen challenge (Figure 3B). In Cluster C-1, MRI  
409 expression is high but almost completely absent from the SB22 transcriptome. In Cluster  
410 C-2, MRI expression was higher than SB22 and was enriched for genes related to

411 defense response, response to stress, response to stimulus, and DNA integration. In  
412 Cluster C-3, the expression of MRI genes is instead lower than SB22. No GO terms were  
413 enriched in cluster C-3.

414

415

416

417

418

419

420

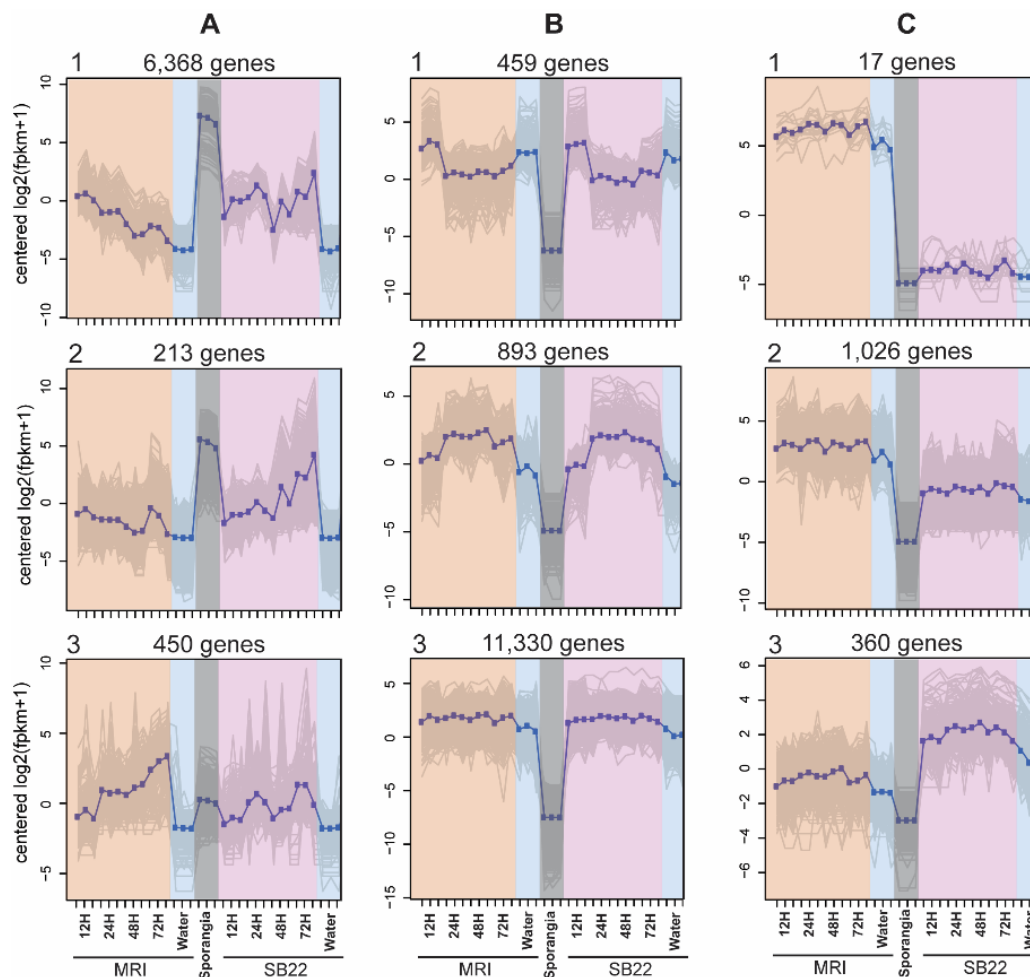

421 **Figure 3. Clusters with expressed plant genes.** Nine gene clusters produced by coarse  
 422 clustering are displayed here. Expression value, y-axis, is on a log<sub>2</sub> scale. Three  
 423 replicates for each dataset are represented by tick marks on the bottom x-axis, with mean  
 424 data plotted as dark blue points and gray shading representing the standard deviation.  
 425 Datasets from MRI are highlighted in orange with 3 replicates from 12 to 72 hpi, SB22  
 426 datasets are colored pink with 3 replicates from 12 to 72 hpi, both water controls are  
 427 labeled blue (MRI left, SB22 right), and the pathogen sporangia control data is colored  
 428 gray. Column A, pathogen gene clusters as all transcripts showed significant expression  
 429 in sporangia pathogen control samples but were absent from plant and infected plant  
 430 samples. Columns B and C gene clusters contain primarily plant transcripts as all  
 431 transcripts showed significant expression in plant and infected plant samples but were  
 432 absent from sporangia pathogen control samples. Column B, plant genes expressed  
 433 similarly in both cultivars. Column C, plant genes with different profiles between cultivars.  
 434

435 **MRI unique expressed genes include NLR, RLK and secondary metabolic enzymes**

436 To understand potential mechanisms underlying the resistance, we repeated the  
 437 clustering with higher stringency ( $p=20$ , see methods for details) resulting in 188 clusters.

438 Eight clusters were chosen as they were expressed in MRI, minimally expressed in SB22,  
439 and showed no expression in the sporangia control. A comprehensive filtering process of  
440 the eight clusters resulted in a total 369 MRI unique candidate genes. These MRI unique  
441 candidate genes can be grouped into secondary metabolic enzymes (22 genes),  
442 immunity related genes including 22 nucleotide-binding site leucine-rich repeat (NLR)  
443 genes and 25 receptor-like kinases (RLK) or receptor-like proteins and others.

444  
445 Detecting secondary metabolic enzymes as MRI unique genes is expected as these two  
446 basil plants produce distinct secondary compounds. For instance, SB22 accumulates a  
447 significant amount of eugenol, while MRI predominantly accumulates methylchavicol  
448 (Rob Pyne, unpublished data). This distinct chemotype prevents MRI from immediate  
449 commercial use. Examining twenty-five secondary metabolite related genes predicted as  
450 MRI unique genes, we found enzymes related to secondary metabolites which specifically  
451 differentiate the MRI and SB22 chemotypes, including cinnamate p-coumarate carboxyl  
452 methyltransferase, enzymes involved in anthocyanin biosynthesis, and chavicol/eugenol  
453 O-methyltransferase, the enzyme that catalyzes the conversion of chavicol to  
454 methylchavicol, as would be predicted from the chemotypes.

455  
456 Unique expression of RLKs and NLRs, both immunity related protein families, in MRI is  
457 of particular interest. Basic plant immunity consists of pattern-triggered immunity (PTI)  
458 and effector-triggered immunity (ETI) (Jones & Dangl, 2006; Cui *et al.*, 2015). Plant PTI  
459 uses receptor-like proteins/kinases (RLPs/RLKs), a large gene family (Chern *et al.*, 2016;  
460 Mendy *et al.*, 2017) that have roles as sensors of microbe-associated molecular patterns

461 (MAMPs) and induce downstream defense reactions (Jones & Dangl, 2006; Dodds &  
462 Rathjen, 2010; Bigeard *et al.*, 2015; Zhou & Zhang, 2020). Plant ETI employs an  
463 intracellular nucleotide-binding site and leucine-rich repeat domain receptors (NLRs) that  
464 play roles in sensing effector proteins secreted by pathogens and regulating downstream  
465 defense signaling (Jones & Dangl, 2006; Cui *et al.*, 2015; Cesari, 2018; Monteiro &  
466 Nishimura, 2018; Wang & Chai, 2020).

467  
468 To investigate basil PTI, we further characterized the RLK BLAST hits. The best RLK  
469 candidate is transcript *mri\_comp170662*, which encodes a full-length malectin-like RLK.  
470 Some predicted receptor-like kinases (RLK) as truncated fragments, such as three  
471 transcripts containing only the leucine-rich repeat (LRR) domain, two containing only  
472 protein kinase domains, and two that were too short to have domain affiliation. Two  
473 transcripts contained an RLK-like domain involved in antifungal and salt tolerance  
474 (Sawano *et al.*, 2007; Zhang *et al.*, 2009). Using the full-length top candidate RLK  
475 transcript *mri\_comp170662*, we identified 12 and 10 homologs in the MRI and SB22  
476 assemblies, respectively. Ten SB22/MRI orthologous pairs can be readily identified  
477 between these two sister cultivars based on a phylogeny (three pair members lacking a  
478 malectin domain were excluded from the tree) (Figure 4a). Three MRI orphan transcripts  
479 including this top RLK candidate *mri\_comp170662* showed increased expression at 12  
480 and 24 hpi compared to the water control (Figure 4b). This RLK candidate contains LRR,  
481 Malectin and kinase domains (Figure 4c).

482



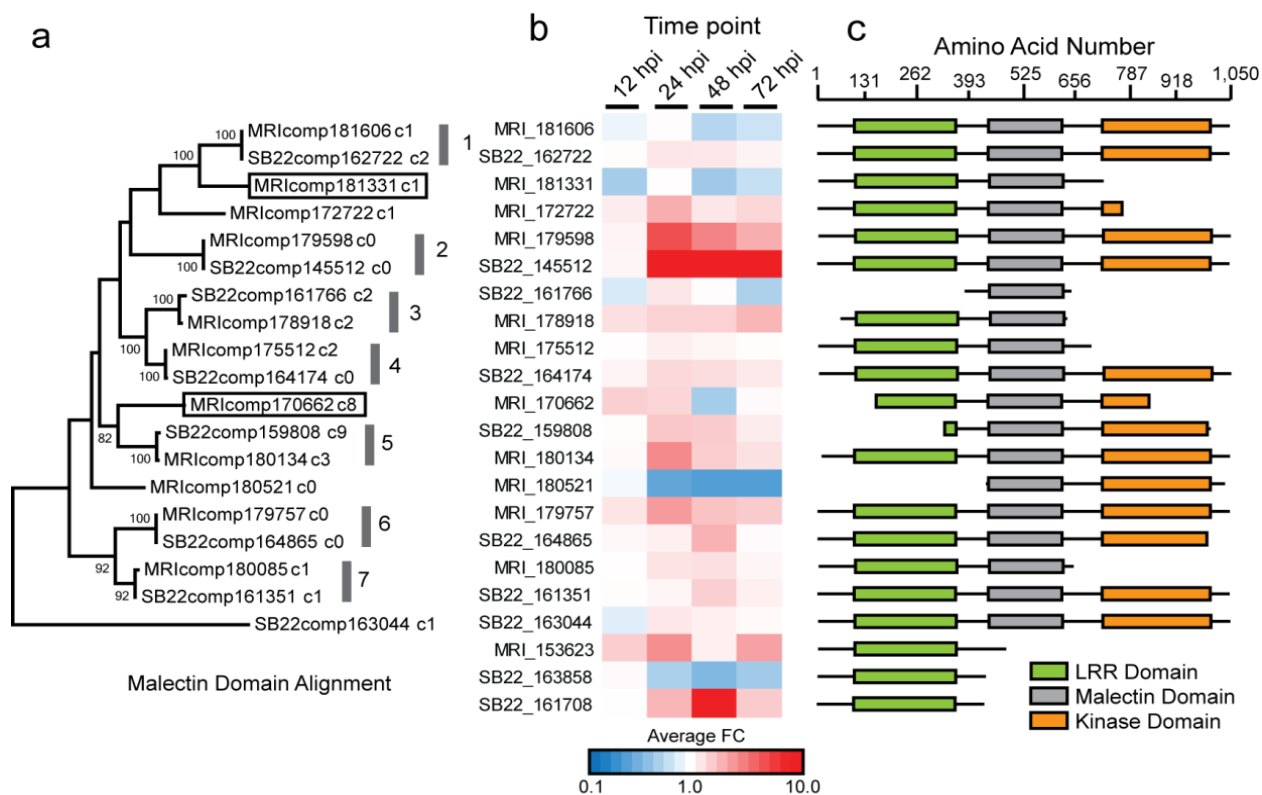

483

484 **Figure 4. Malectin-like RLK proteins in MRI and SB22.** (a) Alignment of 19 of 22 RLK  
 485 proteins by their conserved malectin domain. Gray bars with numbers represent  
 486 orthologous pairs and boxes indicate sequences absent from the SB22 cultivar. (b) Fold  
 487 change compared to water for MRI and SB22 RLKs across infected plant samples. (c)  
 488 Protein domain structure of 22 RLK hits generated from translated nucleotide  
 489 sequences. Transcript IDs are those of the adjacent fold change row.

490

#### 491 NLRs upregulation in MRI during infection

492 To identify unique MRI NLR resistance genes involved in ETI, we focused on Cluster C-  
 493 1 where all 17 transcripts are highly expressed in MRI upon infection but almost absent  
 494 from the SB22 transcriptome. Two transcripts, comp\_178221\_c0 and comp\_160460\_c0,  
 495 are putative NLR resistance genes encoding a late blight resistance protein homolog R1A  
 496 (gi:848916018 and gi:848932751) from spotted monkey flower (*Erythranthe guttata*),  
 497 which belongs to the order Lamiales including basil.

498

499 Members of the plant NLR protein family have been characterized as sensors,  
500 recognizing specific microbial effectors in response to ongoing host-pathogen  
501 coevolution, or as helpers involved in signal transduction (Wu *et al.*, 2017). These proteins  
502 are highly conserved in eukaryotic immune responses (Wu *et al.*, 2017). NLRs contain a  
503 central nucleotide-binding domain and a C-terminal leucine-rich repeat region that confers  
504 specificity to the receptor (Wu *et al.*, 2017; Prigozhin & Krasileva, 2020). There are three  
505 subfamilies of NLRs defined by presence of one of three functional N-terminal domains:  
506 Resistance To Powdery Mildew 8 (RPW8), Coiled-Coil (CC), or Toll/Interleukin-1  
507 Receptor homology (TIR) (Prigozhin & Krasileva).

508  
509 The coiled-coil domain NLR subfamily (CC-NLRs) comprises several well-characterized  
510 intracellular receptors, including Recognition of *Peronospora Parasitica* 1 (RPP1) genes  
511 conferring resistance to downy mildew in *A. thaliana* (Krasileva *et al.*, 2010). CC-NLRs  
512 are characterized by an N-terminal CC domain, which has been associated with  
513 oligomerization in characterized CC-NLRs including barley mildew locus A MLA10 and *A.*  
514 *thaliana* ZAR1, an NLR that polymerizes to form a plant “resistosome” during the immune  
515 response (Maekawa *et al.*, 2011; Adachi *et al.*, 2019).

516  
517 We focused on validating our computational prediction and further examined our top  
518 candidate NLR transcript comp160460\_c0 identified in Cluster C-1. Transcript  
519 comp\_160460\_c0, MRI Resistance gene 1 (MRI-R1), encodes a full-length CC-NLR  
520 protein of 887 aa with all three functional domains. This NLR candidate is uniquely  
521 expressed and differentially upregulated in MRI in the presence of the pathogen (Figure

522 5A). Based on mapping results and expression analyses, while MRI-R1 is expressed in  
523 the control samples, its expression is significantly increased in the pathogen-inoculated  
524 samples throughout the time-course of infection. Specifically, MRI-R1 was 2-fold  
525 upregulated between 12 and 24 hpi and upregulated expression was maintained 48- and  
526 72-hpi. Mapping the SB22 infected assemblies against the MRI-R1 transcript sequence  
527 as a reference confirmed that there was no detectable expression of MRI-R1 detected in  
528 susceptible samples.

529  
530 To determine whether MRI-R1 activity could be attributed to presence/absence  
531 polymorphism between MRI and SB22 or the differential regulation at transcriptional level,  
532 we designed primers to amplify the coding region of the full-length MRI-R1 transcript  
533 using PCR. Forward primer 1BF flanks the 5' end of the coding sequence, and reverse  
534 primer 14R targets the 3' end of the gene. This primer pair produced an amplicon of the  
535 MRI-R1 gene from MR1, but not from SB22 or the water template negative control (Figure  
536 4B). Internal primers were designed to further examine MRI-R1 like genes in MRI and  
537 SB22 (Supporting Information Table S1). PCR using internal forward primer 9F, which  
538 flanks the NB-ARC domain, paired with 3' end primer 14R, resulted in gene amplification  
539 from MRI and potentially off-target or ortholog amplification from SB22 (Figure 5B). These  
540 results suggest that the full MRI-R1 gene is unique to MRI, but that there is some partial  
541 sequence conservation in a similar gene of unknown functional status in SB22. Thus,  
542 MRI-R1 represents another case of R gene polymorphism among closely related  
543 organisms.

544

545 The MRI-R1 amplicon detected in the MRI gDNA appeared to be approximately 800bp  
546 larger than predicted from the RNA transcripts, indicating the potential presence of a non-  
547 coding intronic region (Figure 5B). We also observed sequence polymorphisms among  
548 MRI-R1 transcripts with 6 different isoforms predicted for the same gene (2 with full coding  
549 sequences, comp160460\_c0\_seq2 and comp160460\_c0\_seq5). To investigate transcript  
550 polymorphisms we isolated and sequenced individual clones from the PCR products. A  
551 total of 12 full-length amplicons were cloned from three MRI plants. Due to the length of  
552 the transcript and to help validate the sequences, between 12 to 25 overlapping  
553 sequences were generated. Assembly and annotation of these MRI-R1 sequences  
554 revealed 4 separate alleles of the gene, supporting the allelic polymorphisms observed in  
555 the transcriptomic data (Figure 4C). The pairwise nucleotide sequence identity among the  
556 four MRI-R1 alleles range from 80% to 96.45%. Alleles 1 and 2 share an identical 827  
557 nucleotide intron sequence while alleles 3 and 4 share an identical 376 nucleotide intron  
558 sequences, which accounts for the size discrepancy in the agarose gel electrophoresis  
559 result (Figure 5B).

560  
561 Analysis of the protein sequences using InterProScan (Jones *et al.*, 2014) showed that  
562 all four alleles contain the CC, NB-ARC, and LRR domains with canonical functional  
563 motifs. The N-terminus of all four alleles begins with an identical MADA motif, a functional  
564 motif conserved in approximately 20% of CC-NLR immune receptors across distantly  
565 related plant species (Bentham *et al.*, 2018; Adachi *et al.*, 2019). The MADA motif has  
566 been shown to be necessary for *Nicotiana benthamiana* NRC4 cell death like the ZAR1  
567 resistosome (Adachi *et al.*, 2019). Similarly, the EDVID motif known to be involved in self-

568 association, direct interactions with cofactors and, in some cases, cell death signaling  
569 resulting in a hypersensitive response (Bentham *et al.*, 2018), is also present in all 4  
570 alleles. The NB-ARC domain of all four alleles also contains the Walker A (P-loop) motif  
571 (GMFGLGKT) (Ramakrishnan *et al.*, 2002), which is critical for nucleotide binding (Steele  
572 *et al.*, 2019). Also present in the four alleles is the MHD-type motif IHD, which has been  
573 shown to be involved in inhibition of autoactivation of R proteins in the absence of a  
574 pathogen (van Ooijen *et al.*, 2008). The MHD motif is proposed to act as a molecular  
575 switch for R protein activation, and the histidine and aspartate residues are the most  
576 highly conserved across R proteins, with the histidine occupying a critical position in an  
577 ADP-binding pocket (van Ooijen *et al.*, 2008). The most variable regions among these 4  
578 alleles are in and between the CC and NB-ARC domains (Figure S3).

579

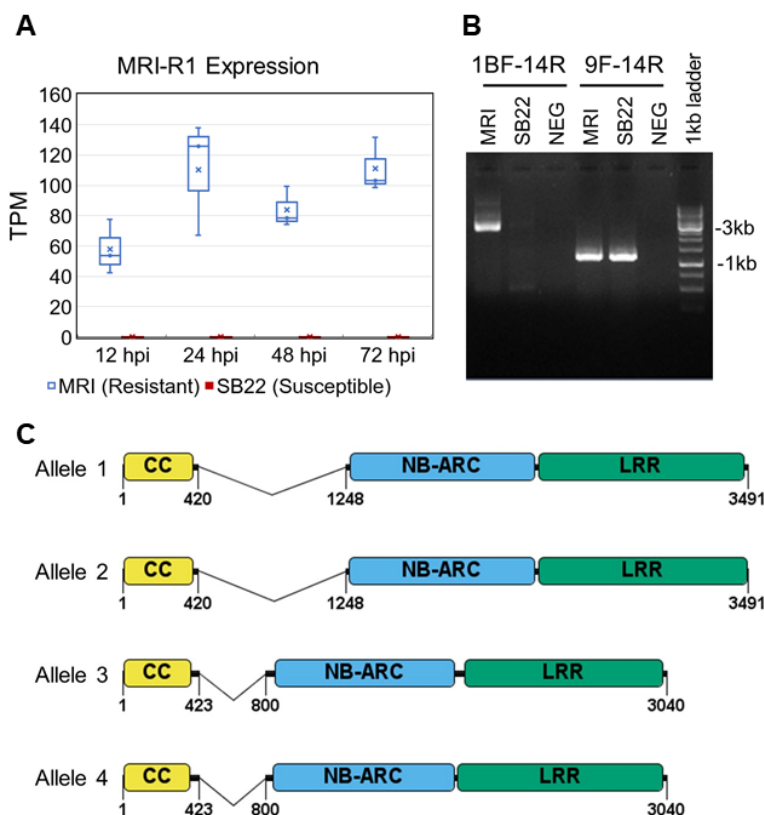

580

581 **Figure 5. MRI-R1 unique presence, expression, and alleles in MRI.** A) Expression of  
582 MRI-R1 in *P. belbahrii*-inoculated MRI and SB22 cultivars expressed in TPM (transcripts  
583 per million). B) Unique amplification of MRI-R1 from MRI (3673bp) using the external  
584 1BF forward and 14R reverse primers. Internal primer, 9F, paired with 14R produces  
585 amplicons of expected size 1206bp in both MRI and SB22. The negative control (NEG)  
586 is water in place of gDNA template. C) Gene models of the 4 MRI-R1 alleles with  
587 domains and subdomains predicted by InterProScan colored as: coiled coil (gold), NB-  
588 ARC (blue), and leucine-rich repeat (green). Introns between the coiled coil and NB-  
589 ARC domains are represented as a single line.  
590

591 Protein structural models of all four alleles were generated in the Robetta server utilizing  
592 RoseTTAFold, a top-ranked deep-learning based protein structure prediction method  
593 (Baek *et al.*, 2021; Du *et al.*, 2021). The resulting allele protein structures were queried  
594 using a distance matrix alignment in the DALI server to search for the closest structural  
595 homologs (Holm, 2020).

596 The resulting top hits for MRI-R1 included plant proteins such as NB-ARC domain from  
597 the tomato immune receptor NRC1 (6S2P), LRR receptor-like serine/threonine-protein  
598 kinase FLS2 (4MN8), and LRR receptor-like serine/threonine-protein kinase GSO1  
599 (6S6Q). The top structural homologs also included human and animal LRR proteins such  
600 as Leucine-rich repeat transmembrane neuronal protein 2 (5Z8X), Dimeric bovine tissue-  
601 extracted decorin (1XCD), and human osteomodulin (5YQ5). The top ten structural  
602 homologs ranged in Z scores of 18-22.2 (with Z scores above 20 indicating definite  
603 homology, and above 8 indicating probable homology), and average deviation in distance  
604 between aligned C $\alpha$  atoms in 3-D superimpositions, indicated by root mean-squared  
605 deviation (RMSD) ranged from 2.2-8.5 angstroms (Supporting Information Table S3)  
606 (Holm, 2020).

607  
608 Structural modeling and homology comparison of each allele were used to refine the initial  
609 sequence-based boundary predictions of CC, NB-ARC, and LRR domains (Figure 6A).  
610 All 4 allele structural models were aligned, revealing conservation of predicted functional  
611 domain structures and active sites. As expected, based on high sequence identity, all four  
612 alleles shared high structural similarity, with slight differences in domain boundaries  
613 predicted by the models (Figure 5B). Allele expression analysis showed a clear bias for  
614 expression of MRI-R1 Allele 1 by MRI in response to basil downy mildew infection.

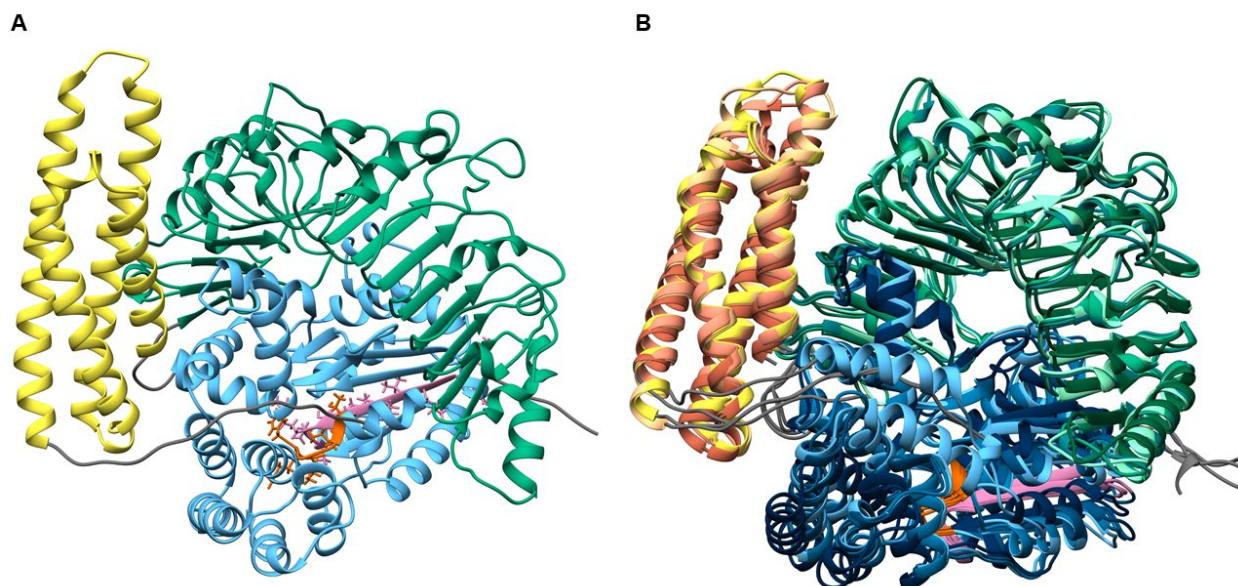

615

616 **Figure 6. MRI-R1 protein structural modeling and alignment.** a) Predicted protein  
617 structure of MRI-R1 allele 1 with domains and motifs colored from N to C terminus as  
618 follows: coiled coil domain in yellow, NB-ARC domain in blue, Walker A motif in red,  
619 Walker B motif in purple, and LRR domain in green. b) Alignment of predicted structures  
620 for all 4 MRI-R1 alleles.

621

### 622 **The presence of MRI-R1 in two Backcross progenies ‘Devotion’ and ‘Obsession’**

623 To assess the contribution of MRI-R1 in the four new downy mildew resistant (DMR)  
624 basil cultivars that integrated MRI resistance genes, we tested each for the presence of  
625 the MRI-R1 gene. A partial sequence of ObActin, the ubiquitous positive control, was  
626 successfully amplified from both BDM-susceptible SB22, BDM-resistant MRI, and all  
627 four DMR cultivars, while no amplification was detected from the negative water  
628 template control (Figure 7). Interestingly, MRI-R1 was detected in only two, ‘Devotion’  
629 and ‘Obsession’, out of the four new DMR cultivars using primers designed to amplify  
630 the full coding region of the gene (Figure 7). The two amplicons are estimated to be  
631 3064 bp and 3515 bp, corresponding to allele 4 and allele 1 for ‘Devotion’ and



632 'Obsession', respectively. These amplicon sizes include 24bp of the 5' UTR (beginning  
633 with primer 1BF), and the 827bp intron (alleles 1 and 2) or the 376 bp intron (alleles 3  
634 and 4). The six individual clones selected and sequenced from 'Devotion' and  
635 'Obsession' were uniform, indicating that only one allele of MRI-R1 was passed from  
636 MRI to these offspring.

637  
638 These four new DMR Cultivars were selected from genetic breeding efforts. Briefly, F1  
639 progeny were generated through the MRI (female)×SB22 (male) cross, exhibiting  
640 dominant gene action (Pyne *et al.*, 2015). An F2 family was generated after F1 self-  
641 pollination and a single resistant individual RUMS469-11 was selected for hybridization  
642 with elite sweet basil inbred line 'SB13', which demonstrates downy mildew and  
643 Fusarium wilt tolerance. Twenty individuals achieving the highest category of reduced  
644 disease severity from the RUMS469-11 (female)×SB13 (male) cross were self-  
645 pollinated to generate full sibling families evaluated for response to downy mildew. The  
646 DMR 'Devotion', 'Obsession', 'Passion' and 'Thunderstruck' were selected from these  
647 inbred lines. We anticipate these four new selected DMR cultivars should inherit genetic  
648 resistance genes from both MRI and SB13.

649

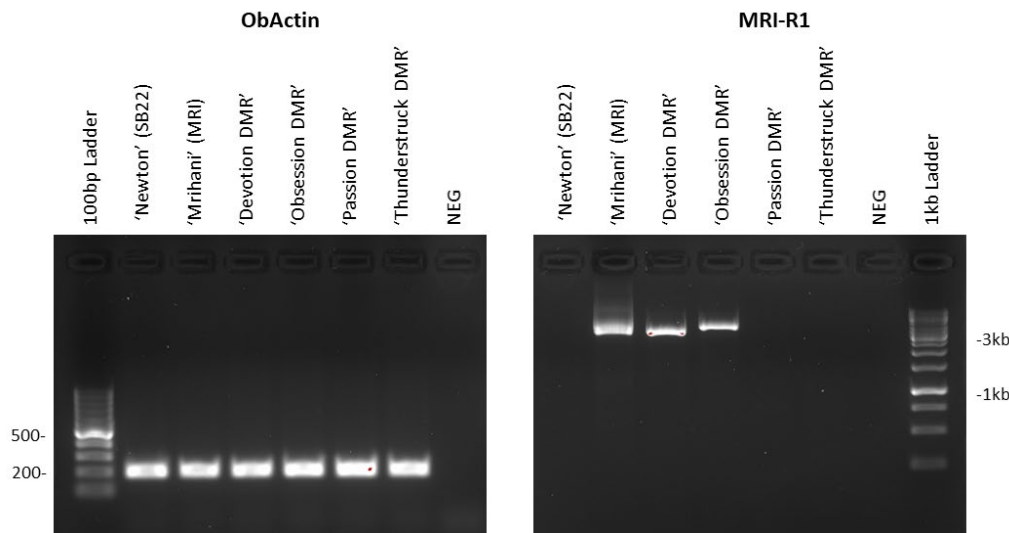

650

651 **Figure 7. MRI-R1 detection in DMR offspring.** Gel electrophoresis showing  
652 amplification of ObActin fragment positive control from all basil cultivars tested on the  
653 left, MRI-R1 amplification from 'Mrihani' (MRI), 'Devotion', and 'Obsession' on the right  
654 using the external 1BF forward and 14R reverse primers. The negative control ('control')  
655 is water in place of gDNA template.

656

### 657 **Differential upregulation of salicylic acid biosynthesis pathways in MRI**

658 Both NLR and RLK genes interact with hormone signaling pathways to activate host  
659 defense (McHale *et al.*, 2006). To understand the involvement of plant hormone signaling  
660 pathways involved in susceptibility and resistance responses, we examined the  
661 expression of genes involved in ethylene, jasmonic acid (JA), abscisic acid (ABA), indole-  
662 3-acetic acid (Auxin), gibberellic acid (GA), and salicylic acid (SA) based on *A. thaliana*  
663 annotation ( $1e^{-20}$ , sequence similarity >40%). No significant differences were observed  
664 between the MRI and SB22 pattern of expression in ethylene, jasmonic acid, abscisic  
665 acid, or gibberellic acid pathway genes (Figure S4, Table S2). We saw a difference in  
666 expression profile for two of five auxin genes; YUC1 and TAA1 both were upregulated at  
667 early timepoints in MRI, however they were not statistically significantly differentially  
668 expressed ( $p$  value > 0.05).

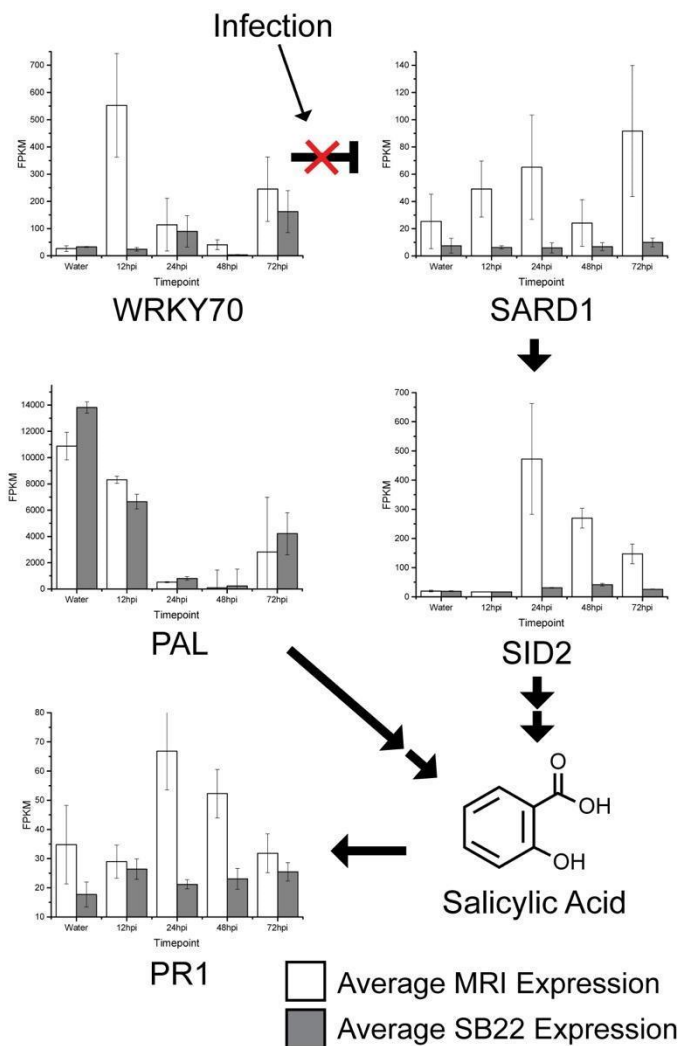

669

670 **Figure 8. MRI and SB22 diverge transcriptionally at salicylic acid synthesis.** Bar  
 671 graphs are the average and standard deviation of three replicates. White bars indicate  
 672 MRI data and gray bars indicate SB22 for each timepoint. Infection releases the  
 673 repression WRKY70 has on SARD1 expression. Double arrows leading from SID2 and  
 674 PAL indicate more than one step to the SA molecule.

675

676 The most striking difference was observed among genes required for the synthesis of  
 677 salicylic acid (Figure 8). Plants possess two biosynthesis pathways to synthesize SA,  
 678 both starting from chorismate, but subsequent steps involve either isochorismate  
 679 synthase (ICS) or SALICYLIC ACID INDUCTION DEFICIENT 2 (SID2) (Wildermuth *et*  
 680 *al.*, 2001) and phenylalanine ammonia-lyase (PAL) (Olsen *et al.*, 2008). There is no

681 significant difference in PAL expression between the two cultivars, but we did observe a  
682 drastic induction of ICS 24 hpi in MRI. For the water control and 12 hpi samples, there  
683 was no significant difference in ICS expression between MRI and SB22. Compared to  
684 SB22, ICS expression in the MRI cultivar is 15, 6 and 5-fold higher at 24, 48 and 72 hpi,  
685 respectively.

686  
687 SARD1 is upstream of SID2 in the SA synthesis pathway, and the average SARD1  
688 expression across all time points is 7-fold higher in MRI compared to SB22 and has  
689 roughly 2-, 2.5-, 0- and 3.6-fold increases at 12, 24, 48 and 72 hpi compared to the water  
690 control. Similarly, PR1, a commonly used marker gene downstream of SA synthesis, is  
691 significantly induced in MRI upon pathogen challenge starting at 24 hpi, confirming the  
692 unique increase of SA in MRI upon pathogen challenge.

693  
694 Together, our data suggest that MRI-derived BDM resistance involves SA. The most  
695 significant change occurred 24 hpi, one day after the encounter of the plant with the  
696 pathogen. WRKY70 is known to repress SARD1 expression in the absence of pathogens  
697 and is required for the activation of some defense genes (Li *et al.*, 2004; Zhou *et al.*,  
698 2018). In MRI, we saw a strong induction in the transcription of WRKY70 at 12 hpi,  
699 increasing expression of SARD1 from water to 24 hpi, and a 23-fold rise in the relative  
700 normalized expression of SID2 at 24 hpi relative to 12 hpi. In SB22, we observed only a  
701 slight increase in WRKY70 expression which was delayed until 24 hpi, and SID2  
702 expression rose only 2.5-fold by 24 hpi and remained effectively stable at later time points.  
703 Similarly, we saw a roughly 2-fold induction in the expression of PR1 in MRI between 12

704 hpi and 24 hpi, consistent with the upregulation of SID2, while at the same time there was  
705 no increase in PR1 expression in SB22 between 12 and 72 hpi.

706

## 707 **DISCUSSION**

708 Here we report the results of transcriptomic sequencing of basil cultivars infected with  
709 *Peronospora belbahrii* with the goals of identifying genes conferring resistance and  
710 understanding what pathways are involved in susceptibility. We sequenced 33 datasets  
711 to a reasonable coverage, likely capturing most transcripts, although total gene length  
712 was shorter than a previous study in sweet basil (Rastogi *et al.*, 2014), and Trinity's  
713 estimate of gene count in the plant samples was greater than expected. Nonetheless, we  
714 identified roughly 21,000 orthologous genes between cultivars with overall high sequence  
715 conservation consistent with closely related individuals. Phylogenetic analysis supports  
716 the hypothesis that SB22 and MRI are closely related, interspecific genotypes, which was  
717 previously shown using SSRs to confirm conservation of the orthologs in the two breeding  
718 parents (Pyne *et al.*, 2018). These results underscore the close relationship between  
719 cultivars and their sexual compatibility, likely providing us with a pool of true genes shared  
720 in MRI and SB22. At the time of this study, no sweet basil genome was available for use  
721 in a reference-based assembly, though a draft genome for Genovese-type cultivar 'Perrie'  
722 has since been published (Gonda *et al.*, 2020). Furthermore, several unique MRI gene  
723 candidate sequences were used to search the *O. basilicum* draft genome and no  
724 significant BLAST hits were retrieved.

725

726

727 Gene expression clustering identified patterns consistent with MRI unique infection-  
728 expressed genes. Annotated MRI unique candidates were found to be enriched for NLR,  
729 RLK, and secondary metabolic proteins. Analysis of the NLR and malectin-like RLK genes  
730 in both MRI and SB22 identified orthologous pairs and cultivar-unique genes. Members  
731 of the NLR and RLK families are known to act alongside or upstream of disease signaling  
732 pathways and serve as good candidate resistance genes. Secondary metabolite genes  
733 identified in the two cultivars correlate well with known chemotypic characteristics  
734 differentiating MRI and SB22. The top candidate NLR prediction is supported by PCR  
735 screening revealing its presence in resistant MRI and absence in susceptible SB22. This  
736 result was further strengthened with the cloning and sequencing-based confirmation of  
737 MRI-R1 alleles, as well as predicted amino acid sequence analysis and protein structure  
738 modeling supporting the hypothesis that this is a unique NLR likely involved in immune  
739 responses to pathogen infection.

740

741 The presence of MRI-R1 was detected in only two out of the four resistant cultivars,  
742 'Devotion' and 'Obsession'. However, recent quantitative trait loci (QTL) analysis  
743 detected at least two major genomic regions (LOD>4.0) that control DM resistance in  
744 the MRI x SB22 F2 mapping population (Pyne *et al.*, 2017), suggesting that the  
745 predicted involvement of MRI-R1 in quantitative disease resistance may be redundant  
746 or have shared function(s) with other NLRs and/or RLKs. We cannot conclusively  
747 determine the functionality of the alleles simply based on the bias for MRI-R1 allele  
748 expression in MRI. The presence of Allele 1 in 'Obsession' and Allele 4 in 'Devotion'  
749 indicates that there may be functional redundancy, and further understanding of the

750 conserved motifs in these alleles suggests that there may be interacting partners that  
751 have an impact on the activity of these proteins. Nevertheless, we are confident that our  
752 transcriptomic pipeline is powerful in detecting resistant genes involved in the host-  
753 pathogen interactions.

754  
755 In addition to prediction of specific genes likely conferring resistance, this comparative  
756 transcriptomic approach was also valuable in revealing physiological mechanisms  
757 involved in basil downy mildew resistance. Salicylic acid signaling is an integral part of  
758 plant defense responses and has been demonstrated to be involved in defense against  
759 downy mildews and other biotrophic pathogens (Delaney Terrence P. *et al.*, 1994; Mohr  
760 *et al.*, 2010). Pathogen virulence strategies have developed to overcome and inhibit  
761 salicylic acid defenses, thus enhancing susceptibility to biotrophic pathogens such as  
762 downy mildew organisms (Caillaud *et al.*, 2013, 2016). This suggests a likely role of  
763 salicylic acid signaling in MRI BDM resistance, though the specific mechanisms of  
764 signaling induction remain unknown. We hypothesize that multiple NLRs and RLKs are  
765 active and have interacting and/or redundant roles in mediating the SA signaling pathway  
766 in MRI. If this hypothesis is correct, utilizing multiple targets in a marker-assisted selective  
767 breeding program will be more effective and robust to pass resistance from parents to  
768 progeny in order to slow the evolution of new pathogen races.

769  
770 This study has utilized mRNA sequencing over an infection time course to provide  
771 strong evidence linking susceptibility to known mechanisms which control defense  
772 responses, and prediction of genes regulating the resistant phenotype. Transcriptomics

773 without the need for a reference genome is a powerful tool for comparative analyses  
774 given the availability of methods for data annotation and pattern identification. The  
775 strong resistance phenotype of MRI compared to SB22 likely led to the strength of the  
776 visible signal between the cultivars. NLRs that confer resistance to biotrophic pathogens  
777 have increased genetic diversity, and here we observe that, despite high genetic  
778 conservation between orthologs (Fig. 1), there are distinct genetic differences in the  
779 NLR repertoire (Van de Weyer *et al.*, 2019).

780  
781 Breeding cultivars with quantitative resistance has been shown to produce durable  
782 resistance, typically through the activity of multiple minor-effect genes (Brown, 2015; Niks  
783 *et al.*, 2015). Other BDM resistant cultivars have been produced through interspecific  
784 hybridization of *O. basilicum* with *O. americanum* var. *pilosum*, leading to dominant  
785 resistance against two races of *P. belbahrii* (Ben-Naim & Weitman, 2021). We have  
786 observed that the downy mildew-resistant basil cultivars succumb to infection in  
787 production systems in different regions, consistent with the report of emerging pathogen  
788 races (Ben-Naim & Weitman, 2021). Therefore, understanding the physiological and  
789 molecular bases of host-pathogen interactions is critical to rapidly developing improved  
790 cultivars, monitoring strategies, and management practices. Identification of suitable  
791 molecular markers conferring multiple sources of resistance will improve breeding for  
792 basil downy mildew resistance and advance the understanding of molecular mechanisms  
793 of resistance and pathogenicity. These developments in approaches and knowledge can  
794 be broadly utilized by plant breeders and pathologists working with downy mildew  
795 pathogens on many different crops. After further validation, the genes predicted here can



796 likely serve as molecular markers for the selection of downy mildew resistant sweet basils,  
797 and investigation and validation of physiological responses to infection may aid in  
798 developing more robust phenotyping assays. This comparative transcriptomics approach  
799 not only revealed candidate resistance genes, but also offered us new insights into  
800 differential infection responses in resistant and susceptible cultivars, which will open new  
801 avenues of investigation to further combat basil downy mildew.

802  
803 This method of analysis is broadly applicable to two-organism biological systems where  
804 the identification of genes involved in any specific interaction is desired. Although  
805 genomes for holy basil (*O. tenuiflorum*) had been published prior to this study and sweet  
806 basil (*O. basilicum*) and *P. belbahrii* genomes have been published since, the methods  
807 described here worked exclusively from RNA sequencing data and did not require the  
808 whole genome sequence. Any system utilizing two organisms from different kingdoms  
809 could be examined using these methods as DNA sequences are differentiable down to  
810 reasonable taxonomic levels.

811  
812 **Acknowledgements**

813 We thank the MGHPCC for providing high-performance computing capacity for the  
814 RNAseq data analysis. This work was supported by the United States Department of  
815 Agriculture, Specialty Crop Research Initiative, National Institute of Food and Agriculture  
816 (USDA/SCRI/NIFA 2018-51181-28383) and USDA Hatch grant (MASR-2009-04374,  
817 MAS-2018-00496). L.-J.M. is also supported by an Investigator Award in Infectious  
818 Diseases and Pathogenesis by the Burroughs Wellcome Fund (BWF-1014893), the

819 National Eye Institute of the National Institutes of Health (R01EY030150) and the National  
820 Science Foundation (IOS-1652641).

821  
822 We thank Chris Joyner and David O'Neil of the College of Natural Sciences Greenhouse  
823 at University of Massachusetts for continued support with plant propagation. We also  
824 thank Erin Patterson for assistance with phylogenetic analysis and Dr. Dilay Hazal Ayhan  
825 for help with allele expression analysis.

826  
827 **Author Contribution**

828 JS, L-JM, RP, and LG participated in the designing of the experiment. RP prepared all  
829 materials for the RNAseq, GAD performed all RNA-seq data analysis. KSA performed  
830 phylogenetic analysis and R-gene cloning, sequencing, and protein structural analyses.  
831 AG directed protein structural and sequence analysis. JM provided initial protein structural  
832 modeling analysis. KSA, GAD and L-JM wrote the manuscript. KSA and GAD prepared  
833 the figures, and all authors edited the paper.

834  
835 **Disclaimer:** This article was prepared while Anne Gershenson was employed at the  
836 University of Massachusetts Amherst. The opinions expressed in this article are the  
837 author's own and do not reflect the view of the National Institutes of Health, the  
838 Department of Health and Human Services, or the United States government.

839  
840  
841

842 **References**

- 843 **Adachi H, Contreras MP, Harant A, Wu C, Derevnina L, Sakai T, Duggan C,**  
844 **Moratto E, Bozkurt TO, Maqbool A, et al. 2019.** An N-terminal motif in NLR immune  
845 receptors is functionally conserved across distantly related plant species (J-M Zhou, D  
846 Weigel, and J-M Zhou, Eds.). *eLife* **8**: e49956.
- 847 **Altschul SF, Gish W, Miller W, Myers EW, Lipman DJ. 1990.** Basic local alignment  
848 search tool. *Journal of Molecular Biology* **215**: 403–410.
- 849 **Andrews S. 2010.** *FASTQC. A quality control tool for high throughput sequence data.*
- 850 **Baek M, DiMaio F, Anishchenko I, Dauparas J, Ovchinnikov S, Lee GR, Wang J,**  
851 **Cong Q, Kinch LN, Schaeffer RD, et al. 2021.** Accurate prediction of protein structures  
852 and interactions using a three-track neural network. *Science* **373**: 871–876.
- 853 **Belbahri L, Calmin G, Pawlowski J, Lefort F. 2005.** Phylogenetic analysis and Real  
854 Time PCR detection of a presumably undescribed *Peronospora* species on sweet basil  
855 and sage. *Mycological Research* **109**: 1276–1287.
- 856 **Ben-Naim Y, Weitman M. 2021.** Joint action of Pb1 and Pb2 provide dominant  
857 complementary resistance against new races of *Peronospora belbahrii* (Basil Downy  
858 Mildew). *Phytopathology*®: PHYTO-02-21-0065-R.
- 859 **Bentham AR, Zdrzałek R, De la Concepcion JC, Banfield MJ. 2018.** Uncoiling CNLs:  
860 Structure/Function Approaches to Understanding CC Domain Function in Plant NLRs.  
861 *Plant and Cell Physiology* **59**: 2398–2408.

- 862 **Bigeard J, Colcombet J, Hirt H. 2015.** Signaling Mechanisms in Pattern-Triggered  
863 Immunity (PTI). *Cell Signaling* **8**: 521–539.
- 864 **Brown JKM. 2015.** Durable Resistance of Crops to Disease: A Darwinian Perspective.  
865 *Annual Review of Phytopathology* **53**: 513–539.
- 866 **Caillaud M-C, Asai S, Rallapalli G, Piquerez S, Fabro G, Jones JDG. 2013.** A downy  
867 mildew effector attenuates salicylic acid-triggered immunity in Arabidopsis by interacting  
868 with the host mediator complex. *PLoS biology* **11**: e1001732–e1001732.
- 869 **Caillaud M-C, Asai S, Rallapalli G, Piquerez S, Fabro G, Jones JDG. 2016.**  
870 Correction: A Downy Mildew Effector Attenuates Salicylic Acid-Triggered Immunity in  
871 Arabidopsis by Interacting with the Host Mediator Complex. *PLOS Biology* **14**:  
872 e1002408.
- 873 **Cesari S. 2018.** Multiple strategies for pathogen perception by plant immune receptors.  
874 *New Phytologist* **219**: 17–24.
- 875 **Chern M, Xu Q, Bart RS, Bai W, Ruan D, Sze-To WH, Canlas PE, Jain R, Chen X,  
876 Ronald PC. 2016.** A Genetic Screen Identifies a Requirement for Cysteine-Rich–  
877 Receptor-Like Kinases in Rice NH1 (OsNPR1)-Mediated Immunity. *PLOS Genetics* **12**:  
878 e1006049.
- 879 **Choi YJ, Choi IY, Lee KJ, Shin HD. 2016.** First Report of Downy Mildew Caused by  
880 *Peronospora belbahrii* on Sweet Basil (*Ocimum basilicum*) in Korea. *Plant Disease* **100**:  
881 2335–2335.

- 882 **Cohen Y, Ben Naim Y, Falach L, Rubin AE. 2017.** Epidemiology of Basil Downy  
883 Mildew. *Phytopathology*® **107**: 1149–1160.
- 884 **Cohen Y, Ben-Naim Y. 2016.** Nocturnal Fanning Suppresses Downy Mildew Epidemics  
885 in Sweet Basil. *PLOS ONE* **11**: e0155330.
- 886 **Cohen Y, Rubin AE. 2015.** Daytime Solar Heating Controls Downy Mildew  
887 *Peronospora belbahrii* in Sweet Basil. *PLOS ONE* **10**: e0126103.
- 888 **Cohen Y, Vaknin M, Ben-Naim Y, Rubin AE. 2013.** Light Suppresses Sporulation and  
889 Epidemics of *Peronospora belbahrii*. *PLOS ONE* **8**: e81282.
- 890 **Cui H, Tsuda K, Parker JE. 2015.** Effector-Triggered Immunity: From Pathogen  
891 Perception to Robust Defense. *Annual Review of Plant Biology* **66**: 487–511.
- 892 **(dataset) USDA National Agricultural Statistics Service (2017).** USDA National  
893 Agricultural Statistics Service.
- 894 **Delaney Terrence P., Uknes Scott, Vernooij Bernard, Friedrich Leslie, Weymann**  
895 **Kris, Negrotto David, Gaffney Thomas, Gut-Rella Manuela, Kessmann Helmut,**  
896 **Ward Eric, et al. 1994.** A Central Role of Salicylic Acid in Plant Disease Resistance.  
897 *Science* **266**: 1247–1250.
- 898 **Dodds PN, Rathjen JP. 2010.** Plant immunity: towards an integrated view of plant–  
899 pathogen interactions. *Nature Reviews Genetics* **11**: 539–548.

- 900 **Du Z, Su H, Wang W, Ye L, Wei H, Peng Z, Anishchenko I, Baker D, Yang J. 2021.**  
901 The trRosetta server for fast and accurate protein structure prediction. *Nature Protocols*  
902 **16**: 5634–5651.
- 903 **Finn RD, Coggill P, Eberhardt RY, Eddy SR, Mistry J, Mitchell AL, Potter SC,**  
904 **Punta M, Qureshi M, Sangrador-Vegas A, et al. 2016.** The Pfam protein families  
905 database: towards a more sustainable future. *Nucleic Acids Research* **44**: D279–D285.
- 906 **Garibaldi A, Minuto A, Gullino ML. 2005.** First Report of Downy Mildew Caused by  
907 *Peronospora* sp. on Basil (*Ocimum basilicum*) in France. *Plant Disease* **89**: 683–683.
- 908 **Garibaldi A, Minuto A, Minuto G, Gullino ML. 2004.** First Report of Downy Mildew on  
909 Basil (*Ocimum basilicum*) in Italy. *Plant Disease* **88**: 312–312.
- 910 **Grabherr MG, Haas BJ, Yassour M, Levin JZ, Thompson DA, Amit I, Adiconis X,**  
911 **Fan L, Raychowdhury R, Zeng Q, et al. 2011.** Full-length transcriptome assembly  
912 from RNA-Seq data without a reference genome. *Nature Biotechnology* **29**: 644–652.
- 913 **Haas BJ, Kamoun S, Zody MC, Jiang RHY, Handsaker RE, Cano LM, Grabherr M,**  
914 **Kodira CD, Raffaele S, Torto-Alalibo T, et al. 2009.** Genome sequence and analysis  
915 of the Irish potato famine pathogen *Phytophthora infestans*. *Nature* **461**: 393–398.
- 916 **Holm L. 2020.** Using Dali for Protein Structure Comparison. In: *Methods in Molecular*  
917 *Biology. Structural Bioinformatics*. New York, NY: Humana, 29–42.

- 918 **Homa K, Barney WP, Ward DL, Wyenandt CA, Simon JE. 2014.** Evaluation of  
919 Fungicides for the Control of *Peronospora belbahrii* on Sweet Basil in New Jersey. *Plant*  
920 *Disease* **98**: 1561–1566.
- 921 **Jones P, Binns D, Chang H-Y, Fraser M, Li W, McAnulla C, McWilliam H, Maslen J,**  
922 **Mitchell A, Nuka G, et al. 2014.** InterProScan 5: genome-scale protein function  
923 classification. *Bioinformatics* **30**: 1236–1240.
- 924 **Jones JDG, Dangl JL. 2006.** The plant immune system. *Nature* **444**: 323–329.
- 925 **Kanetis L, Vasiliou A, Neophytou G, Samouel S, Tsaltas D. 2014.** First Report of  
926 Downy Mildew Caused by *Peronospora belbahrii* on Sweet Basil (*Ocimum basilicum*) in  
927 Cyprus. *Plant Disease* **98**: 283–283.
- 928 **Khateri H, Calmin G, Moarrefzadeh, Lassaad B, Lefort F. 2007.** First report of downy  
929 mildew caused by *Peronospora* sp. on basil in Northern Iran. *JOURNAL OF PLANT*  
930 *PATHOLOGY* **89**: S70.
- 931 **Krasileva KV, Dahlbeck D, Staskawicz BJ. 2010.** Activation of an *Arabidopsis*  
932 Resistance Protein Is Specified by the in Planta Association of Its Leucine-Rich Repeat  
933 Domain with the Cognate Oomycete Effector. *The Plant Cell* **22**: 2444–2458.
- 934 **Langmead B, Trapnell C, Pop M, Salzberg SL. 2009.** Ultrafast and memory-efficient  
935 alignment of short DNA sequences to the human genome. *Genome Biology* **10**: R25.
- 936 **Li B, Dewey CN. 2011.** RSEM: accurate transcript quantification from RNA-Seq data  
937 with or without a reference genome. *BMC Bioinformatics* **12**: 323.

- 938 **Li J, Brader G, Palva ET. 2004.** The WRKY70 Transcription Factor: A Node of  
939 Convergence for Jasmonate-Mediated and Salicylate-Mediated Signals in Plant  
940 Defense[W]. *The Plant Cell* **16**: 319–331.
- 941 **Madeira F, Park YM, Lee J, Buso N, Gur T, Madhusoodanan N, Basutkar P, Tivey**  
942 **ARN, Potter SC, Finn RD, et al. 2019.** The EMBL-EBI search and sequence analysis  
943 tools APIs in 2019. *Nucleic Acids Res* **47**: W636–W641.
- 944
- 945 **Maekawa T, Cheng W, Spiridon LN, Töller A, Lukasik E, Saijo Y, Liu P, Shen Q-H,**  
946 **Micluta MA, Somssich IE, et al. 2011.** Coiled-Coil Domain-Dependent  
947 Homodimerization of Intracellular Barley Immune Receptors Defines a Minimal  
948 Functional Module for Triggering Cell Death. *Cell Host & Microbe* **9**: 187–199.
- 949 **Marchler-Bauer A, Derbyshire MK, Gonzales NR, Lu S, Chitsaz F, Geer LY, Geer**  
950 **RC, He J, Gwadz M, Hurwitz DI, et al. 2015.** CDD: NCBI’s conserved domain  
951 database. *Nucleic Acids Research* **43**: D222–D226.
- 952 **Martínez de la Parte E, Pérez-Vicente L, Bernal B, García D. 2010.** First report of  
953 *Peronospora* sp. on sweet basil (*Ocimum basilicum*) in Cuba. *Plant Pathology* **59**: 800–  
954 800.
- 955 **McGrath MT. 2020b.** Efficacy of Conventional Fungicides for Downy Mildew in Field-  
956 Grown Sweet Basil in the United States. *Plant Disease* **104**: 2967–2972.
- 957 **McGrath MT. 2021.** Where in the USA is Basil Downy Mildew?



- 958 **McGrath MT. 2022a.** Basil Downy Mildew. *Cornell Vegetables*.
- 959 **McHale L, Tan X, Koehl P, Michelmore RW. 2006.** Plant NBS-LRR proteins:  
960 adaptable guards. *Genome Biology* **7**: 212.
- 961 **McLeod A, Coertze S, Mostert L. 2006.** First Report of a *Peronospora* Species on  
962 Sweet Basil in South Africa. *Plant Disease* **90**: 1115–1115.
- 963 **Mendy B, Wang’ombe MW, Radakovic ZS, Holbein J, Ilyas M, Chopra D, Holton N,**  
964 **Zipfel C, Grundler FMW, Siddique S. 2017.** Arabidopsis leucine-rich repeat receptor–  
965 like kinase NILR1 is required for induction of innate immunity to parasitic nematodes.  
966 *PLOS Pathogens* **13**: e1006284.
- 967 **Minh BQ, Schmidt HA, Chernomor O, Schrempf D, Woodhams MD, von Haeseler**  
968 **A, Lanfear R. 2020.** IQ-TREE 2: New Models and Efficient Methods for Phylogenetic  
969 Inference in the Genomic Era. *Molecular Biology and Evolution* **37**: 1530–1534.
- 970 **Mohr TJ, Mammarella ND, Hoff T, Woffenden BJ, Jelesko JG, McDowell JM. 2010.**  
971 The Arabidopsis Downy Mildew Resistance Gene RPP8 Is Induced by Pathogens and  
972 Salicylic Acid and Is Regulated by W Box cis Elements. *Molecular Plant-Microbe*  
973 *Interactions*® **23**: 1303–1315.
- 974 **Monteiro F, Nishimura MT. 2018.** Structural, Functional, and Genomic Diversity of  
975 Plant NLR Proteins: An Evolved Resource for Rational Engineering of Plant Immunity.  
976 *Annual Review of Phytopathology* **56**: 243–267.

- 977 **Nagy G, Horváth A. 2011.** Occurrence of Downy Mildew Caused by *Peronospora*  
978 *belbahrii* on Sweet Basil in Hungary. *Plant Disease* **95**: 1034–1034.
- 979 **Nelson R, Wiesner-Hanks T, Wisser R, Balint-Kurti P. 2018.** Navigating complexity to  
980 breed disease-resistant crops. *Nature Reviews Genetics* **19**: 21–33.
- 981 **Niks RE, Qi X, Marcel TC. 2015.** Quantitative Resistance to Biotrophic Filamentous  
982 Plant Pathogens: Concepts, Misconceptions, and Mechanisms. *Annual Review of*  
983 *Phytopathology* **53**: 445–470.
- 984 **van Ooijen G, Mayr G, Kasiem MMA, Albrecht M, Cornelissen BJC, Takken FLW.**  
985 **2008.** Structure–function analysis of the NB-ARC domain of plant disease resistance  
986 proteins. *Journal of Experimental Botany* **59**: 1383–1397.
- 987 **Pettersen EF, Goddard TD, Huang CC, Couch GS, Greenblatt DM, Meng EC, Ferrin**  
988 **TE. 2004.** UCSF Chimera—A visualization system for exploratory research and  
989 analysis. *Journal of Computational Chemistry* **25**: 1605–1612.
- 990 **Prigozhin DM, Krasileva KV. 2020.** *Intraspecies diversity reveals a subset of highly*  
991 *variable plant immune receptors and predicts their binding sites.* *Plant Biology.*
- 992 **Prigozhin DM, Krasileva KV.** Analysis of intraspecies diversity reveals a subset of  
993 highly variable plant immune receptors and predicts their binding sites. : 35.
- 994 **Pyne R, Honig J, Vaiciunas J, Koroch A, Wyenandt C, Bonos S, Simon J. 2017.** A  
995 first linkage map and downy mildew resistance QTL discovery for sweet basil (*Ocimum*

- 996 basilicum) facilitated by double digestion restriction site associated DNA sequencing  
997 (ddRADseq) (T Yin, Ed.). *PLOS ONE* **12**: e0184319.
- 998 **Pyne RM, Honig JA, Vaiciunas J, Wyenandt CA, Simon JE. 2018.** Population  
999 structure, genetic diversity and downy mildew resistance among *Ocimum* species  
1000 germplasm. *BMC Plant Biology* **18**: 69.
- 1001 **Pyne RM, Koroch AR, Wyenandt CA, Simon JE. 2015.** Inheritance of Resistance to  
1002 Downy Mildew in Sweet Basil. *Journal of the American Society for Horticultural Science*  
1003 **140**: 396–403.
- 1004 **Ramakrishnan C, Dani VS, Ramasarma T. 2002.** A conformational analysis of Walker  
1005 motif A [GXXXXGKT (S)] in nucleotide-binding and other proteins. *Protein Engineering,*  
1006 *Design and Selection* **15**: 783–798.
- 1007 **Rastogi S, Kalra A, Gupta V, Khan F, Lal RK, Tripathi AK, Parameswaran S,**  
1008 **Gopalakrishnan C, Ramaswamy G, Shasany AK. 2015.** Unravelling the genome of  
1009 Holy basil: an “incomparable” “elixir of life” of traditional Indian medicine. *BMC*  
1010 *Genomics* **16**: 413.
- 1011 **Rastogi S, Meena S, Bhattacharya A, Ghosh S, Shukla RK, Sangwan NS, Lal RK,**  
1012 **Gupta MM, Lavana UC, Gupta V, et al. 2014.** De novo sequencing and comparative  
1013 analysis of holy and sweet basil transcriptomes. *BMC Genomics* **15**: 588.
- 1014 **Robert X, Gouet P. 2014.** Deciphering key features in protein structures with the new  
1015 ENDscript server. *Nucleic Acids Research* **42**: W320–W324.

- 1016 **Roberts PD, Raid RN, Harmon PF, Jordan SA, Palmateer AJ. 2009.** First Report of  
1017 Downy Mildew Caused by a *Peronospora* sp. on Basil in Florida and the United States.  
1018 *Plant Disease* **93**: 199–199.
- 1019 **Robinson MD, McCarthy DJ, Smyth GK. 2010.** edgeR: a Bioconductor package for  
1020 differential expression analysis of digital gene expression data. *Bioinformatics* **26**: 139–  
1021 140.
- 1022 **Robinson JT, Thorvaldsdóttir H, Winckler W, Guttman M, Lander ES, Getz G,**  
1023 **Mesirov JP. 2011.** Integrative genomics viewer. *Nature Biotechnology* **29**: 24–26.
- 1024 **Ronco L, Rollán C, Choi YJ, Shin HD. 2009.** Downy mildew of sweet basil (*Ocimum*  
1025 *basilicum*) caused by *Peronospora* sp. in Argentina. *Plant Pathology* **58**: 395–395.
- 1026 **Šafránková I, Holková L. 2014.** The First Report of Downy Mildew Caused by  
1027 *Peronospora belbahrii* on Sweet Basil in Greenhouses in the Czech Republic. *Plant*  
1028 *Disease* **98**: 1579–1579.
- 1029 **Sawano Y, Miyakawa T, Yamazaki H, Tanokura M, Hatano K. 2007.** Purification,  
1030 characterization, and molecular gene cloning of an antifungal protein from *Ginkgo biloba*  
1031 seeds. **388**: 273–280.
- 1032 **Simon JE, Pyne RM, Wyenandt CA. 2018.** Downy mildew resistant/tolerant sweet  
1033 basil varieties. 10159212, filed November 14, 2017, and issued December 25, 2018.  
1034 <https://patents.justia.com/patent/10159212>.

- 1035 **Steele JFC, Hughes RK, Banfield MJ. 2019.** Structural and biochemical studies of an  
1036 NB-ARC domain from a plant NLR immune receptor. *PLOS ONE* **14**: e0221226.
- 1037 **Tamura K, Stecher G, Peterson D, Filipski A, Kumar S. 2013.** MEGA6: Molecular  
1038 Evolutionary Genetics Analysis version 6.0. *Molecular biology and evolution* **30**: 2725–  
1039 2729.
- 1040 **Van de Weyer A-L, Monteiro F, Furzer OJ, Nishimura MT, Cevik V, Witek K, Jones  
1041 JDG, Dangl JL, Weigel D, Bemm F. 2019.** A Species-Wide Inventory of NLR Genes  
1042 and Alleles in *Arabidopsis thaliana*. *Cell* **178**: 1260-1272.e14.
- 1043 **Vieira RF, Simon JE. 2006.** Chemical characterization of basil (*Ocimum* spp.) based on  
1044 volatile oils. *Flavour and Fragrance Journal* **21**: 214–221.
- 1045 **Wang J, Chai J. 2020.** Structural Insights into the Plant Immune Receptors PRRs and  
1046 NLRs. *Plant physiology* **182**: 1566–1581.
- 1047 **Waterhouse AM, Procter JB, Martin DMA, Clamp M, Barton GJ. 2009.** Jalview  
1048 Version 2—a multiple sequence alignment editor and analysis workbench.  
1049 *Bioinformatics* **25**: 1189–1191.
- 1050 **Wildermuth MC, Dewdney J, Wu G, Ausubel FM. 2001.** Isochorismate synthase is  
1051 required to synthesize salicylic acid for plant defence. *Nature* **414**: 562–565.
- 1052 **Wu C-H, Abd-El-Haliem A, Bozkurt TO, Belhaj K, Terauchi R, Vossen JH, Kamoun  
1053 S. 2017.** NLR network mediates immunity to diverse plant pathogens. *Proceedings of  
1054 the National Academy of Sciences* **114**: 8113–8118.

- 1055 **Wyenandt CA, Simon JE, Pyne RM, Homa K, McGrath MT, Zhang S, Raid RN, Ma**  
1056 **L-J, Wick R, Guo L, et al. 2015.** Basil Downy Mildew ( *Peronospora belbahrii* ):  
1057 Discoveries and Challenges Relative to Its Control. *Phytopathology*® **105**: 885–894.
- 1058 **Zhang L, Tian L-H, Zhao J-F, Song Y, Zhang C-J, Guo Y. 2009.** Identification of an  
1059 apoplastic protein involved in the initial phase of salt stress response in rice root by two-  
1060 dimensional electrophoresis. *Plant physiology* **149**: 916–928.
- 1061 **Zhou M, Lu Y, Bethke G, Harrison BT, Hatsugai N, Katagiri F, Glazebrook J. 2018.**  
1062 WRKY70 prevents axenic activation of plant immunity by direct repression of SARD1.  
1063 *New Phytologist* **217**: 700–712.
- 1064 **Zhou J-M, Zhang Y. 2020.** Plant Immunity: Danger Perception and Signaling. *Cell* **181**:  
1065 978–989.
- 1066
- 1067
- 1068
- 1069
- 1070
- 1071
- 1072
- 1073
- 1074
- 1075
- 1076

1077 **Supporting Information**

1078 Additional supporting information may be found in the online version of this article.

1079 **Fig. S1** Average Quality Scores

1080 **Fig. S2** Pathogen Read Percentage

1081 **Table S1** Primers Used In This Study

1082 **Table S2** Coarse Clustering

1083 **Table S3** Top Ten Structural Homologs

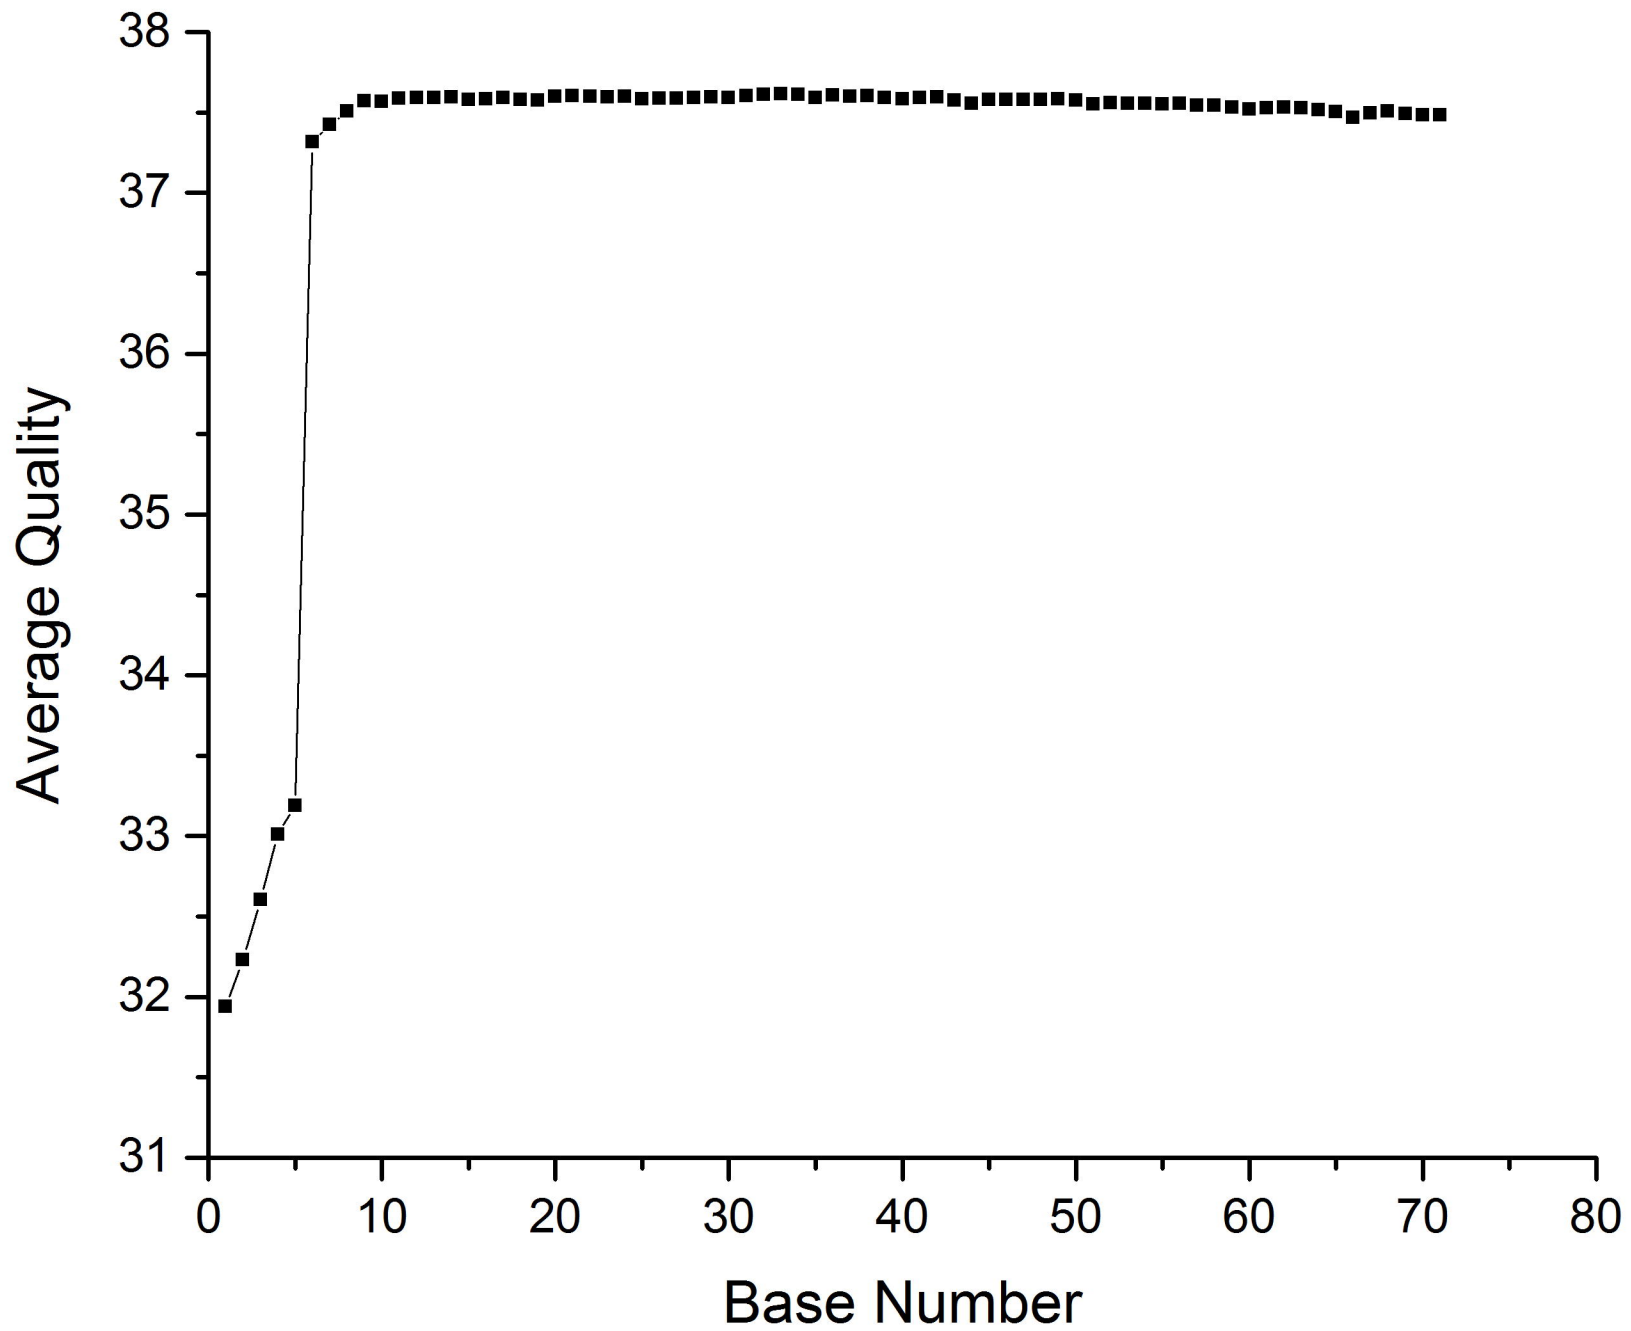



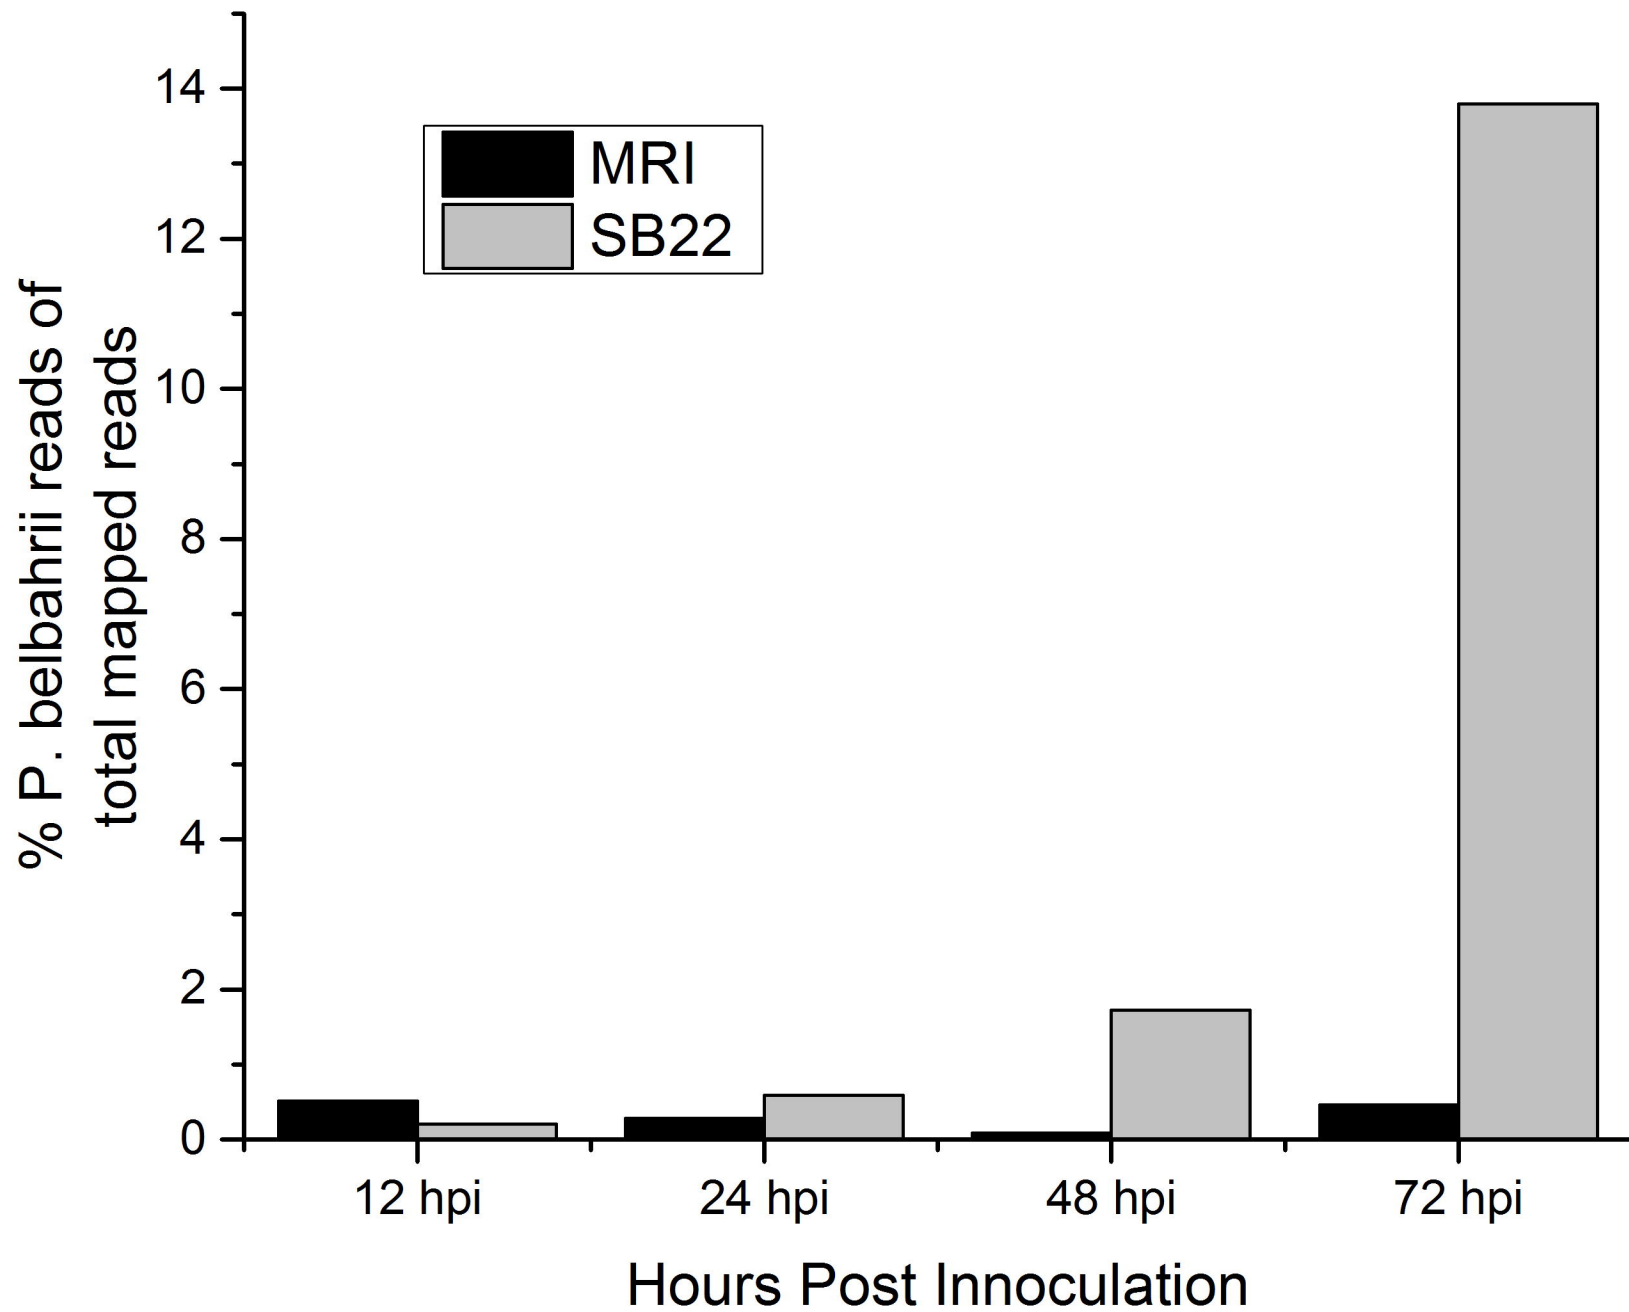

Source: https://www.biorxiv.org/content/10.1101/2022.05.23.491563v1.full.pdf
